# Supplementary material for: Exhaustive Genome-Wide Search for SNP-SNP Interactions Across 10 Human Diseases
Source: PubMed Central journal article supplement (PMC4938657; doi:10.1534/g3.116.028563), 2016-05-12
Supplement: supp_g3.116.028563_FigureS1.pdf [file supp_g3.116.028563_FigureS1.pdf]

**Figure S-1. Quantile-quantile plots for interaction P-values from the discovery datasets.**

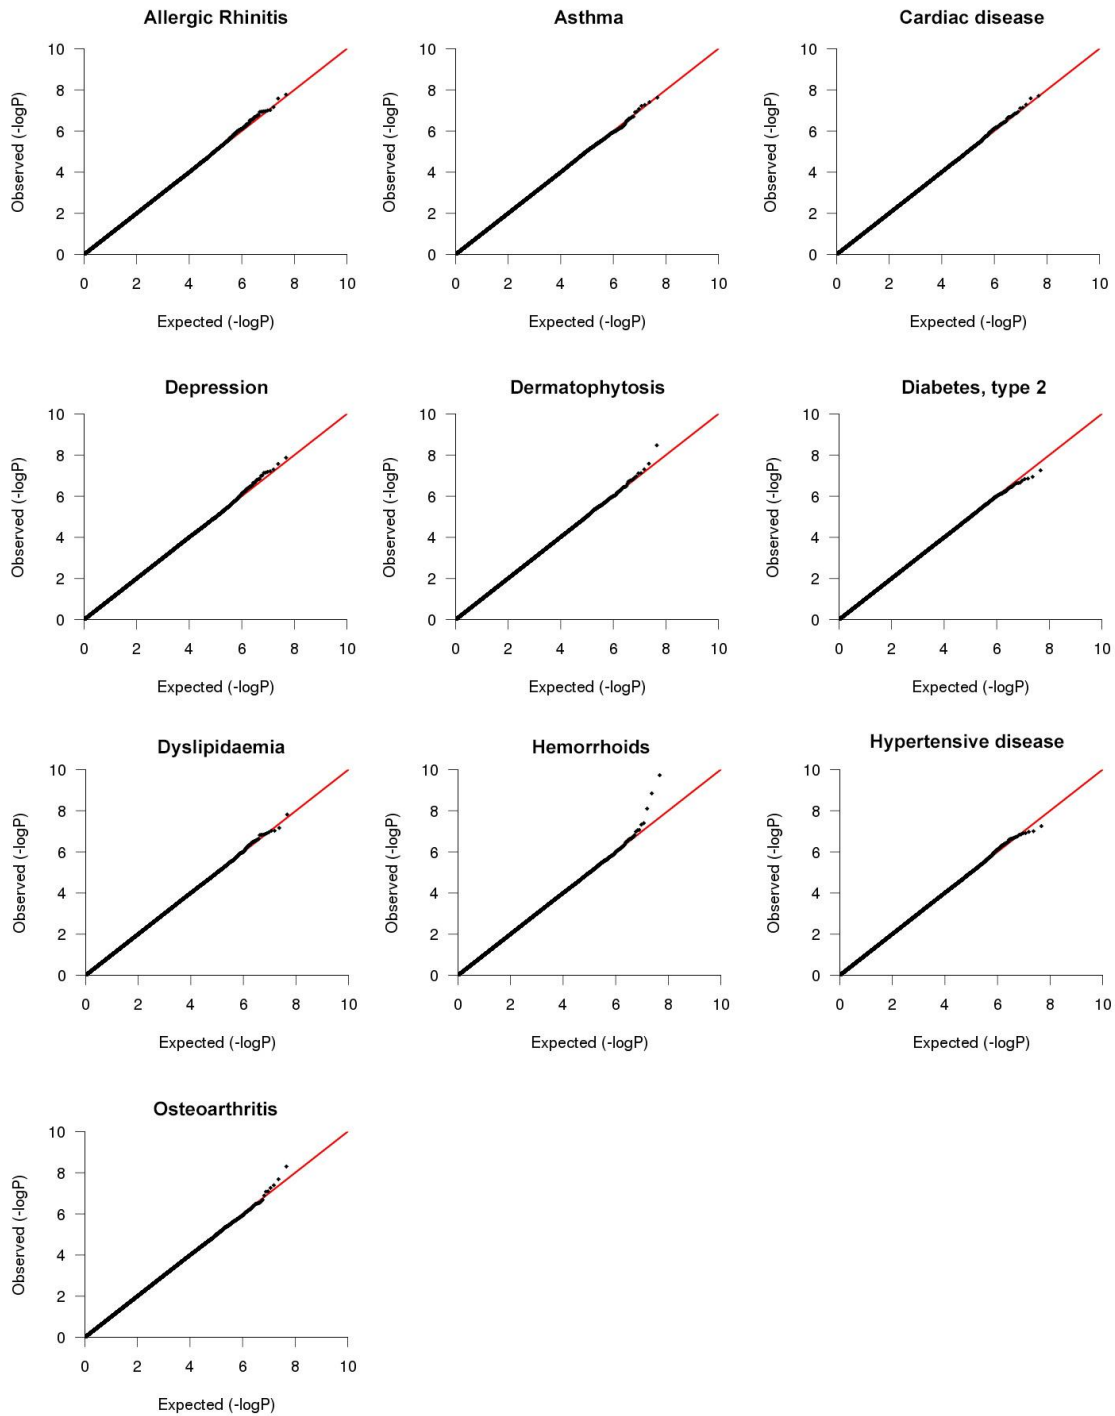

Interaction P-values were obtained via FastEpistasis, among all pairwise interactions involving approximately 10,000 randomly selected SNPs in each discovery dataset (approximately  $5 \times 10^7$  pairs each).
