# Supplementary material for: Exhaustive Genome-Wide Search for SNP-SNP Interactions Across 10 Human Diseases
Source: PubMed Central journal article supplement (PMC4938657; doi:10.1534/g3.116.028563), 2016-05-12
Supplement: supp_g3.116.028563_TableS1.pdf [file supp_g3.116.028563_TableS1.pdf]

**Table S-1. Subject quality control.**

| <b>Inclusion/exclusion step</b>                                                           | <b>N, subjects</b> |
|-------------------------------------------------------------------------------------------|--------------------|
| Initially available (genotyped on the EUR chip)                                           | 62,318             |
| Excluded, ambiguous SNP-estimated sex                                                     | 55                 |
| Excluded, subject call rate < 95%                                                         | 0                  |
| Excluded, relatedness; $\pi$ -hat $\geq$ 0.20                                             | 16,457             |
| Excluded, race not reported as "white" and/or European principal components not available | 398                |
| Excluded, PCA outliers                                                                    | 237                |
| Remaining for inclusion in disease-specific analyses                                      | 45,171             |

Quality control steps were applied sequentially, in the order indicated from top to bottom.
