# Supplementary material for: Exhaustive Genome-Wide Search for SNP-SNP Interactions Across 10 Human Diseases
Source: PubMed Central journal article supplement (PMC4938657; doi:10.1534/g3.116.028563), 2016-05-12
Supplement: supp_g3.116.028563_TableS2.pdf [file supp_g3.116.028563_TableS2.pdf]

**Table S-2. Disease-specific subject counts.**

| Condition            | N, subjects available, post-QC | Minimum allowed estimated age of controls | N, excluded, controls below minimum estimated age | Final subject counts |             |             |             |
|----------------------|--------------------------------|-------------------------------------------|---------------------------------------------------|----------------------|-------------|-------------|-------------|
|                      |                                |                                           |                                                   | Discovery            |             | Replication |             |
|                      |                                |                                           |                                                   | N, Cases             | N, Controls | N, Cases    | N, Controls |
| Allergic rhinitis    | 45,171                         | 18 years                                  | 0                                                 | 10,258               | 30,933      | 976         | 3,004       |
| Asthma               | 45,171                         | 18 years                                  | 0                                                 | 6,486                | 34,669      | 988         | 3,028       |
| Cardiac disease      | 45,171                         | 34 years                                  | 1,106                                             | 11,069               | 28,979      | 1,004       | 3,013       |
| Depression           | 45,171                         | 24 years                                  | 215                                               | 4,824                | 36,162      | 978         | 2,992       |
| Dermatophytosis      | 45,171                         | 18 years                                  | 0                                                 | 5,163                | 36,083      | 989         | 2,936       |
| Diabetes, type 2     | 45,171                         | 34 years                                  | 1,106                                             | 4,563                | 35,573      | 986         | 2,943       |
| Dyslipidaemia        | 45,171                         | 34 years                                  | 1,106                                             | 23,061               | 17,021      | 986         | 2,997       |
| Hemorrhoids          | 45,171                         | 29 years                                  | 493                                               | 6,199                | 34,356      | 1,006       | 3,117       |
| Hypertensive disease | 45,171                         | 34 years                                  | 1,106                                             | 21,713               | 18,332      | 984         | 3,036       |
| Osteoarthritis       | 45,171                         | 39 years                                  | 2,193                                             | 15,454               | 23,578      | 961         | 2,985       |
