# Supplementary material for: Exhaustive Genome-Wide Search for SNP-SNP Interactions Across 10 Human Diseases
Source: PubMed Central journal article supplement (PMC4938657; doi:10.1534/g3.116.028563), 2016-05-12
Supplement: supp_g3.116.028563_TableS3.pdf [file supp_g3.116.028563_TableS3.pdf]

**Table S-3. SNP quality control.**

| <b>Condition</b>     | <b>N, SNPs initially available</b> | <b>N, Excluded, could not map to hg19</b> | <b>N, Excluded, SNP call rate &lt; 98% (overall)</b> | <b>N, Excluded, MAF &lt; 0.15 (overall)</b> | <b>N, Excluded, non-autosomal</b> | <b>N, Excluded, call rate &lt; 98% in cases and/or controls</b> | <b>N, Excluded, HWE <math>p &lt; 10^{-5}</math> in controls</b> | <b>N, remaining for final analysis</b> |
|----------------------|------------------------------------|-------------------------------------------|------------------------------------------------------|---------------------------------------------|-----------------------------------|-----------------------------------------------------------------|-----------------------------------------------------------------|----------------------------------------|
| Allergic rhinitis    | 670,176                            | 464                                       | 36,300                                               | 321,745                                     | 7,316                             | 488                                                             | 3,643                                                           | 300,220                                |
| Asthma               | 670,176                            | 464                                       | 36,300                                               | 321,745                                     | 7,316                             | 305                                                             | 3,385                                                           | 300,661                                |
| Cardiac disease      | 670,176                            | 464                                       | 36,300                                               | 321,745                                     | 7,316                             | 325                                                             | 3,210                                                           | 300,816                                |
| Depression           | 670,176                            | 464                                       | 36,300                                               | 321,745                                     | 7,316                             | 463                                                             | 3,694                                                           | 300,194                                |
| Dermatophytosis      | 670,176                            | 464                                       | 36,300                                               | 321,745                                     | 7,316                             | 414                                                             | 3,648                                                           | 300,289                                |
| Diabetes, type 2     | 670,176                            | 464                                       | 36,300                                               | 321,745                                     | 7,316                             | 392                                                             | 3,673                                                           | 300,286                                |
| Dyslipidaemia        | 670,176                            | 464                                       | 36,300                                               | 321,745                                     | 7,316                             | 267                                                             | 2,267                                                           | 301,817                                |
| Hemorrhoids          | 670,176                            | 464                                       | 36,300                                               | 321,745                                     | 7,316                             | 348                                                             | 3,583                                                           | 300,420                                |
| Hypertensive disease | 670,176                            | 464                                       | 36,300                                               | 321,745                                     | 7,316                             | 336                                                             | 2,429                                                           | 301,586                                |
| Osteoarthritis       | 670,176                            | 464                                       | 36,300                                               | 321,745                                     | 7,316                             | 259                                                             | 2,788                                                           | 301,304                                |

N refers to number of SNPs. Quality control steps were applied sequentially, in the order indicated from left to right.
