# Supplementary material for: Exhaustive Genome-Wide Search for SNP-SNP Interactions Across 10 Human Diseases
Source: PubMed Central journal article supplement (PMC4938657; doi:10.1534/g3.116.028563), 2016-05-12
Supplement: supp_g3.116.028563_TableS4.pdf [file supp_g3.116.028563_TableS4.pdf]

**Table S-4. Genomic inflation, marginal effects.**

| Condition            | Dataset     | $\lambda$ (genomic inflation factor) |                         |                                   |
|----------------------|-------------|--------------------------------------|-------------------------|-----------------------------------|
|                      |             | No adjustment                        | Adjustment for PC1, PC2 | Adjustment for PC1, PC2, sex, age |
| Allergic rhinitis    | Discovery   | 1.03                                 | 1.03                    | 1.03                              |
|                      | Replication | 1.01                                 | 1.01                    | 1.01                              |
| Asthma               | Discovery   | 1.03                                 | 1.03                    | 1.03                              |
|                      | Replication | 1.02                                 | 1.02                    | 1.02                              |
| Cardiac disease      | Discovery   | 1.14                                 | 1.02                    | 1.02                              |
|                      | Replication | 1.00                                 | 1.00                    | 1.00                              |
| Depression           | Discovery   | 1.04                                 | 1.01                    | 1.02                              |
|                      | Replication | 1.01                                 | 1.01                    | 1.01                              |
| Dermatophytosis      | Discovery   | 1.23                                 | 1.02                    | 1.02                              |
|                      | Replication | 1.04                                 | 1.00                    | 1.00                              |
| Diabetes, type 2     | Discovery   | 1.08                                 | 1.08                    | 1.09                              |
|                      | Replication | 1.02                                 | 1.01                    | 1.02                              |
| Dyslipidaemia        | Discovery   | 1.11                                 | 1.07                    | 1.08                              |
|                      | Replication | 1.04                                 | 1.00                    | 1.02                              |
| Hemorrhoids          | Discovery   | 1.04                                 | 1.01                    | 1.01                              |
|                      | Replication | 1.03                                 | 1.00                    | 1.00                              |
| Hypertensive disease | Discovery   | 1.30                                 | 1.10                    | 1.13                              |
|                      | Replication | 1.01                                 | 1.01                    | 1.00                              |
| Osteoarthritis       | Discovery   | 1.03                                 | 1.02                    | 1.03                              |
|                      | Replication | 1.01                                 | 1.01                    | 1.01                              |

Red shading indicates  $\lambda > 1.05$ .
