# Supplementary material for: Exhaustive Genome-Wide Search for SNP-SNP Interactions Across 10 Human Diseases
Source: PubMed Central journal article supplement (PMC4938657; doi:10.1534/g3.116.028563), 2016-05-12
Supplement: supp_g3.116.028563_TableS5.pdf [file supp_g3.116.028563_TableS5.pdf]

**Table S-5. Database search for previously known disease-related candidate genes**

| Condition                    | GAD search term(s)                                                                                                                                                                               | N, unique gene symbols found |
|------------------------------|--------------------------------------------------------------------------------------------------------------------------------------------------------------------------------------------------|------------------------------|
| Allergic rhinitis            | "rhinitis"                                                                                                                                                                                       | 122                          |
| Asthma                       | "asthma"                                                                                                                                                                                         | 762                          |
| Cardiac disease              | "heart failure", "heart disease", "myocardial infarc", "angina", "cardiomyopathy", "tachycardia", "aneurysm", "cardiac arrest"                                                                   | 1,579                        |
| Depression                   | "depression", "depressive"                                                                                                                                                                       | 350                          |
| Dermatophytosis <sup>1</sup> | "dermatophytosis"                                                                                                                                                                                | 3                            |
| Diabetes, type 2             | "type 2 diabetes", "type ii diabetes", "diabetes, type 2", "diabetes type 2", "diabetes mellitus, type 2", "diabetes mellitus type 2", "diabetes mellitus, type ii", "diabetes mellitus type ii" | 3,001                        |
| Dyslipidaemia                | "dyslipid", "hyperlipid", "hypertriglycer"                                                                                                                                                       | 150                          |
| Hemorrhoids <sup>1</sup>     | "hemorrhoid"                                                                                                                                                                                     | 7                            |
| Hypertensive disease         | "hypertens"                                                                                                                                                                                      | 971                          |
| Osteoarthritis               | "osteoarthritis"                                                                                                                                                                                 | 150                          |

**GAD:** Genetic Association Database. Searches were not case-sensitive. Search terms were allowed to be sub-strings of larger strings in GAD (for example, "hypertens" would return entries including either "hypertension" and "hypertensive"). **1:** Zero (dermatophytosis) or only one (hemorrhoids) resulting gene symbol found in GAD. The DisGenNET database (<http://www.disgenet.org/>) was also searched for these two conditions, using the exact condition names as the search terms. This resulted in three (dermatophytosis) and six (hemorrhoids) additional gene symbols for these conditions.
