# Supplementary material for: Exhaustive Genome-Wide Search for SNP-SNP Interactions Across 10 Human Diseases
Source: PubMed Central journal article supplement (PMC4938657; doi:10.1534/g3.116.028563), 2016-05-12
Supplement: supp_g3.116.028563_TableS6.pdf [file supp_g3.116.028563_TableS6.pdf]

**Table S-6. SNP annotations, by category.**

| Condition            | N, Total | N, any gene (G) | N, exonic (EX) | N, by RegulomeDB score |       |       |               | N, by prior disease relevance type |          | N, marginal P < 0.05 (M) |
|----------------------|----------|-----------------|----------------|------------------------|-------|-------|---------------|------------------------------------|----------|--------------------------|
|                      |          |                 |                | 1                      | 2     | 3     | 1,2, or 3 (R) | Gene (D)                           | eQTL (Q) |                          |
| Allergic rhinitis    | 300,220  | 136,829         | 2,629          | 3,805                  | 4,375 | 4,007 | 12,187        | 851                                | 851      | 16,260                   |
| Asthma               | 300,661  | 136,642         | 2,628          | 3,797                  | 4,361 | 4,008 | 12,166        | 12,845                             | 1,827    | 16,987                   |
| Cardiac disease      | 300,816  | 136,892         | 2,628          | 3,804                  | 4,370 | 4,015 | 12,189        | 28,872                             | 2,341    | 16,284                   |
| Depression           | 300,194  | 136,619         | 2,627          | 3,799                  | 4,364 | 4,006 | 12,169        | 6,351                              | 303      | 15,566                   |
| Dermatophytosis      | 300,289  | 136,680         | 2,627          | 3,801                  | 4,366 | 4,008 | 12,175        | 26                                 | 6        | 16,090                   |
| Diabetes, type 2     | 300,286  | 136,667         | 2,622          | 3,803                  | 4,368 | 4,012 | 12,183        | 34,168                             | 2,848    | 18,613                   |
| Dyslipidaemia        | 301,817  | 137,356         | 2,640          | 3,827                  | 4,385 | 4,031 | 12,243        | 1,775                              | 199      | 18,637                   |
| Hemorrhoids          | 300,420  | 136,704         | 2,629          | 3,800                  | 4,364 | 4,015 | 12,179        | 79                                 | 6        | 15,560                   |
| Hypertensive disease | 301,586  | 137,247         | 2,644          | 3,819                  | 4,384 | 4,026 | 12,229        | 15,054                             | 1,756    | 20,319                   |
| Osteoarthritis       | 301,304  | 137,149         | 2,635          | 3,820                  | 4,378 | 4,019 | 12,217        | 2,170                              | 797      | 16,345                   |

N refers to number of SNPs. The categories (except the RegulomeDB sub-categories of 1, 2, and 3) are not mutually exclusive.
