# Supplementary material for: Exhaustive Genome-Wide Search for SNP-SNP Interactions Across 10 Human Diseases
Source: PubMed Central journal article supplement (PMC4938657; doi:10.1534/g3.116.028563), 2016-05-12
Supplement: supp_g3.116.028563_TableS7.pdf [file supp_g3.116.028563_TableS7.pdf]

**Table S-7. Power analyses, discovery datasets.**

| Condition                                                                                                 | Type I error ( $\alpha$ ) | Quanto        |               | Simulated      |          |          |          |          |          |
|-----------------------------------------------------------------------------------------------------------|---------------------------|---------------|---------------|----------------|----------|----------|----------|----------|----------|
|                                                                                                           |                           |               |               | Fast epistasis |          |          | BOOST    |          |          |
|                                                                                                           |                           | Int OR = 1.25 | Int OR = 1.50 | f = 0.15       | f = 0.20 | f = 0.25 | f = 0.15 | f = 0.20 | f = 0.25 |
| <b>Allergic rhinitis</b><br>Cases = 10,258<br>Controls = 30,933<br>Prev = 0.25<br>b = 0.243, 0.241, 0.238 | E-7                       | 0.439         | 0.999         | 1.00           | 1.00     | 1.00     | 1.00     | 1.00     | 1.00     |
|                                                                                                           | E-8                       | 0.289         | 0.999         | 1.00           | 1.00     | 1.00     | 1.00     | 1.00     | 1.00     |
|                                                                                                           | E-9                       | 0.175         | 0.999         | 0.93           | 1.00     | 1.00     | 1.00     | 1.00     | 1.00     |
|                                                                                                           | E-10                      | 0.099         | 0.999         | 0.91           | 1.00     | 1.00     | 1.00     | 1.00     | 1.00     |
|                                                                                                           | E-11                      | 0.051         | 0.997         | 0.87           | 1.00     | 1.00     | 1.00     | 1.00     | 1.00     |
|                                                                                                           | E-12                      | 0.025         | 0.992         | 0.73           | 1.00     | 1.00     | 1.00     | 1.00     | 1.00     |
| <b>Asthma</b><br>Cases = 6,486<br>Controls = 34,669<br>Prev = 0.15<br>b = 0.146, 0.144, 0.143             | E-7                       | 0.187         | 0.999         | 0.63           | 0.99     | 1.00     | 0.41     | 0.93     | 1.00     |
|                                                                                                           | E-8                       | 0.098         | 0.996         | 0.48           | 0.95     | 1.00     | 0.25     | 0.91     | 1.00     |
|                                                                                                           | E-9                       | 0.047         | 0.987         | 0.27           | 0.92     | 1.00     | 0.16     | 0.79     | 0.99     |
|                                                                                                           | E-10                      | 0.021         | 0.970         | 0.19           | 0.86     | 1.00     | 0.08     | 0.68     | 0.99     |
|                                                                                                           | E-11                      | 0.009         | 0.938         | 0.12           | 0.73     | 0.99     | 0.03     | 0.57     | 0.99     |
|                                                                                                           | E-12                      | 0.004         | 0.888         | 0.08           | 0.64     | 0.99     | 0.01     | 0.51     | 0.99     |
| <b>Cardiac disease</b><br>Cases = 11,069<br>Controls = 28,979<br>Prev = 0.25<br>b = 0.243, 0.241, 0.239   | E-7                       | 0.475         | 0.999         | 1.00           | 1.00     | 1.00     | 1.00     | 1.00     | 1.00     |
|                                                                                                           | E-8                       | 0.321         | 0.999         | 1.00           | 1.00     | 1.00     | 0.99     | 1.00     | 1.00     |
|                                                                                                           | E-9                       | 0.199         | 0.999         | 0.99           | 1.00     | 1.00     | 0.99     | 1.00     | 1.00     |
|                                                                                                           | E-10                      | 0.115         | 0.999         | 0.99           | 1.00     | 1.00     | 0.95     | 1.00     | 1.00     |
|                                                                                                           | E-11                      | 0.062         | 0.998         | 0.97           | 1.00     | 1.00     | 0.90     | 1.00     | 1.00     |
|                                                                                                           | E-12                      | 0.031         | 0.995         | 0.92           | 1.00     | 1.00     | 0.84     | 1.00     | 1.00     |
| <b>Depression</b><br>Cases = 4,824<br>Controls = 36,162<br>Prev = 0.15<br>b = 0.146, 0.145, 0.143         | E-7                       | 0.081         | 0.981         | 0.29           | 0.81     | 1.00     | 0.18     | 0.57     | 0.95     |
|                                                                                                           | E-8                       | 0.036         | 0.953         | 0.21           | 0.69     | 0.99     | 0.07     | 0.49     | 0.92     |
|                                                                                                           | E-9                       | 0.015         | 0.903         | 0.14           | 0.54     | 0.93     | 0.01     | 0.38     | 0.87     |
|                                                                                                           | E-10                      | 0.006         | 0.827         | 0.04           | 0.41     | 0.89     | 0.01     | 0.29     | 0.82     |
|                                                                                                           | E-11                      | 0.002         | 0.727         | 0.01           | 0.33     | 0.84     | 0.01     | 0.21     | 0.73     |
|                                                                                                           | E-12                      | 0.001         | 0.610         | 0.01           | 0.27     | 0.80     | 0.00     | 0.11     | 0.63     |
| <b>Dermatophytosis</b><br>Cases = 5,163<br>Controls = 36,083<br>Prev = 0.15<br>b = 0.146, 0.145, 0.143    | E-7                       | 0.100         | 0.989         | 0.45           | 0.96     | 1.00     | 0.24     | 0.85     | 1.00     |
|                                                                                                           | E-8                       | 0.046         | 0.971         | 0.28           | 0.89     | 1.00     | 0.11     | 0.75     | 1.00     |
|                                                                                                           | E-9                       | 0.020         | 0.935         | 0.15           | 0.81     | 1.00     | 0.04     | 0.57     | 0.99     |
|                                                                                                           | E-10                      | 0.008         | 0.876         | 0.08           | 0.71     | 1.00     | 0.02     | 0.45     | 0.94     |
|                                                                                                           | E-11                      | 0.003         | 0.793         | 0.04           | 0.56     | 0.98     | 0.00     | 0.27     | 0.90     |
|                                                                                                           | E-12                      | 0.001         | 0.689         | 0.01           | 0.42     | 0.95     | 0.00     | 0.20     | 0.85     |
| <b>Diabetes, type 2</b><br>Cases = 4,563<br>Controls = 35,573<br>Prev = 0.15<br>b = 0.146, 0.145, 0.143   | E-7                       | 0.067         | 0.973         | 0.21           | 0.74     | 0.99     | 0.10     | 0.55     | 0.95     |
|                                                                                                           | E-8                       | 0.029         | 0.933         | 0.14           | 0.59     | 0.97     | 0.05     | 0.44     | 0.87     |
|                                                                                                           | E-9                       | 0.011         | 0.868         | 0.08           | 0.50     | 0.92     | 0.02     | 0.28     | 0.81     |
|                                                                                                           | E-10                      | 0.004         | 0.777         | 0.02           | 0.34     | 0.84     | 0.01     | 0.18     | 0.72     |
|                                                                                                           | E-11                      | 0.001         | 0.663         | 0.01           | 0.25     | 0.79     | 0.01     | 0.12     | 0.60     |
|                                                                                                           | E-12                      | 0.001         | 0.539         | 0.01           | 0.19     | 0.74     | 0.00     | 0.06     | 0.51     |
| <b>Dyslipidaemia</b><br>Cases = 23,061<br>Controls = 17,021<br>Prev = 0.55<br>b = 0.535                   | E-7                       | 0.582         | 0.999         | 1.00           | N/A      | N/A      | 1.00     | N/A      | N/A      |
|                                                                                                           | E-8                       | 0.422         | 0.999         | 1.00           | N/A      | N/A      | 1.00     | N/A      | N/A      |
|                                                                                                           | E-9                       | 0.282         | 0.999         | 1.00           | N/A      | N/A      | 1.00     | N/A      | N/A      |
|                                                                                                           | E-10                      | 0.175         | 0.999         | 1.00           | N/A      | N/A      | 1.00     | N/A      | N/A      |
|                                                                                                           | E-11                      | 0.101         | 0.999         | 1.00           | N/A      | N/A      | 1.00     | N/A      | N/A      |
|                                                                                                           | E-12                      | 0.055         | 0.997         | 1.00           | N/A      | N/A      | 1.00     | N/A      | N/A      |
| <b>Hemorrhoids</b><br>Cases = 6,199<br>Controls = 34,356<br>Prev = 0.15<br>b = 0.146, 0.145, 0.143        | E-7                       | 0.165         | 0.998         | 0.63           | 0.97     | 1.00     | 0.32     | 0.92     | 1.00     |
|                                                                                                           | E-8                       | 0.084         | 0.993         | 0.41           | 0.94     | 1.00     | 0.17     | 0.88     | 1.00     |
|                                                                                                           | E-9                       | 0.039         | 0.981         | 0.23           | 0.89     | 1.00     | 0.08     | 0.80     | 1.00     |
|                                                                                                           | E-10                      | 0.017         | 0.957         | 0.15           | 0.85     | 1.00     | 0.06     | 0.66     | 1.00     |
|                                                                                                           | E-11                      | 0.007         | 0.916         | 0.07           | 0.76     | 1.00     | 0.03     | 0.49     | 0.98     |
|                                                                                                           | E-12                      | 0.003         | 0.854         | 0.04           | 0.62     | 0.99     | 0.00     | 0.38     | 0.94     |
| <b>Hypertensive disease</b><br>Cases = 21,713<br>Controls = 18,332<br>Prev = 0.50<br>b = 0.485            | E-7                       | 0.613         | 0.999         | 1.00           | N/A      | N/A      | 1.00     | N/A      | N/A      |
|                                                                                                           | E-8                       | 0.453         | 0.999         | 1.00           | N/A      | N/A      | 1.00     | N/A      | N/A      |
|                                                                                                           | E-9                       | 0.310         | 0.999         | 1.00           | N/A      | N/A      | 1.00     | N/A      | N/A      |
|                                                                                                           | E-10                      | 0.196         | 0.999         | 1.00           | N/A      | N/A      | 1.00     | N/A      | N/A      |
|                                                                                                           | E-11                      | 0.116         | 0.999         | 1.00           | N/A      | N/A      | 1.00     | N/A      | N/A      |
|                                                                                                           | E-12                      | 0.065         | 0.998         | 1.00           | N/A      | N/A      | 1.00     | N/A      | N/A      |
| <b>Osteoarthritis</b><br>Cases = 15,454<br>Controls = 23,578<br>Prev = 0.40<br>b = 0.389, 0.385, 0.381    | E-7                       | 0.587         | 0.999         | 1.00           | 1.00     | 1.00     | 1.00     | 1.00     | 1.00     |
|                                                                                                           | E-8                       | 0.427         | 0.999         | 1.00           | 1.00     | 1.00     | 1.00     | 1.00     | 1.00     |
|                                                                                                           | E-9                       | 0.287         | 0.999         | 1.00           | 1.00     | 1.00     | 1.00     | 1.00     | 1.00     |
|                                                                                                           | E-10                      | 0.179         | 0.999         | 1.00           | 1.00     | 1.00     | 1.00     | 1.00     | 1.00     |
|                                                                                                           | E-11                      | 0.104         | 0.999         | 1.00           | 1.00     | 1.00     | 1.00     | 1.00     | 1.00     |
|                                                                                                           | E-12                      | 0.057         | 0.998         | 1.00           | 1.00     | 1.00     | 1.00     | 1.00     | 1.00     |

f: relative penetrance. b: baseline penetrance, corresponding to each respective relative penetrance going from left to right. Green indicates power > 80%. Yellow indicates the genome-wide significance threshold. N/A: not estimated because a model penetrance would exceed 1.0.
