# Supplementary material for: Exhaustive Genome-Wide Search for SNP-SNP Interactions Across 10 Human Diseases
Source: PubMed Central journal article supplement (PMC4938657; doi:10.1534/g3.116.028563), 2016-05-12
Supplement: supp_g3.116.028563_TableS8.pdf [file supp_g3.116.028563_TableS8.pdf]

**Table S-8. Power analyses, replication datasets.**

| Condition                                                                                             | Type I error ( $\alpha$ ) | Quanto    |           | Simulated      |          |          |          |          |          |
|-------------------------------------------------------------------------------------------------------|---------------------------|-----------|-----------|----------------|----------|----------|----------|----------|----------|
|                                                                                                       |                           |           |           | Fast epistasis |          |          | BOOST    |          |          |
|                                                                                                       |                           | OR = 1.25 | OR = 1.50 | f = 0.15       | f = 0.20 | f = 0.25 | f = 0.15 | f = 0.20 | f = 0.25 |
| <b>Allergic rhinitis</b><br>Cases = 976<br>Controls = 3,004<br>Prev = 0.25<br>b = 0.243, 0.241, 0.238 | 0.05                      | 0.363     | 0.845     | 0.66           | 0.90     | 0.99     | 0.46     | 0.81     | 0.94     |
| <b>Asthma</b><br>Cases = 988<br>Controls = 3,028<br>Prev = 0.15<br>b = 0.146, 0.144, 0.143            | 0.05                      | 0.366     | 0.856     | 0.49           | 0.77     | 0.92     | 0.28     | 0.57     | 0.80     |
| <b>Cardiac disease</b><br>Cases = 1,004<br>Controls = 3,013<br>Prev = 0.25<br>b = 0.243, 0.241, 0.239 | 0.05                      | 0.366     | 0.848     | 0.75           | 0.96     | 0.99     | 0.54     | 0.85     | 0.98     |
| <b>Depression</b><br>Cases = 978<br>Controls = 2,992<br>Prev = 0.15<br>b = 0.146, 0.145, 0.143        | 0.05                      | 0.367     | 0.857     | 0.48           | 0.69     | 0.90     | 0.33     | 0.54     | 0.74     |
| <b>Dermatophytosis</b><br>Cases = 989<br>Controls = 2,936<br>Prev = 0.15<br>b = 0.146, 0.145, 0.143   | 0.05                      | 0.368     | 0.857     | 0.53           | 0.77     | 0.91     | 0.29     | 0.56     | 0.79     |
| <b>Diabetes, type 2</b><br>Cases = 986<br>Controls = 2,943<br>Prev = 0.15<br>b = 0.146, 0.145, 0.143  | 0.05                      | 0.367     | 0.857     | 0.42           | 0.66     | 0.90     | 0.29     | 0.44     | 0.76     |
| <b>Dyslipidaemia</b><br>Cases = 986<br>Controls = 2,997<br>Prev = 0.55<br>b = 0.535                   | 0.05                      | 0.343     | 0.802     | 1.00           | N/A      | N/A      | 1.00     | N/A      | N/A      |
| <b>Hemorrhoids</b><br>Cases = 1,006<br>Controls = 3,117<br>Prev = 0.15<br>b = 0.146, 0.145, 0.143     | 0.05                      | 0.351     | 0.812     | 0.63           | 0.80     | 0.93     | 0.44     | 0.72     | 0.86     |
| <b>Hypertensive disease</b><br>Cases = 984<br>Controls = 3,036<br>Prev = 0.50<br>b = 0.485            | 0.05                      | 0.347     | 0.809     | 1.00           | N/A      | N/A      | 0.98     | N/A      | N/A      |
| <b>Osteoarthritis</b><br>Cases = 961<br>Controls = 2,985<br>Prev = 0.40<br>b = 0.389, 0.385, 0.381    | 0.05                      | 0.346     | 0.814     | 0.93           | 1.00     | 1.00     | 0.82     | 0.98     | 1.00     |

f: relative penetrance. b: baseline penetrance, corresponding to each respective relative penetrance going from left to right. Green indicates power > 80%. N/A: not estimated because a model penetrance would exceed 1.0.
