# Supplementary material for: Exhaustive Genome-Wide Search for SNP-SNP Interactions Across 10 Human Diseases
Source: PubMed Central journal article supplement (PMC4938657; doi:10.1534/g3.116.028563), 2016-05-12
Supplement: supp_g3.116.028563_TableS9.pdf [file supp_g3.116.028563_TableS9.pdf]

**Table S-9. Penetrance table for the model simulated in epiSIM.**

|                |    | SNP A genotype |              |              |
|----------------|----|----------------|--------------|--------------|
|                |    | AA             | Aa           | aa           |
| SNP B genotype | BB | b              | b            | b            |
|                | Bb | b              | $b(1 + f)^2$ | $b(1 + f)^3$ |
|                | bb | b              | $b(1 + f)^3$ | $b(1 + f)^4$ |

b: baseline penetrance. f: relative penetrance.
