# Supplementary material for: Exhaustive Genome-Wide Search for SNP-SNP Interactions Across 10 Human Diseases
Source: PubMed Central journal article supplement (PMC4938657; doi:10.1534/g3.116.028563), 2016-05-12
Supplement: supp_g3.116.028563_TableS10.pdf [file supp_g3.116.028563_TableS10.pdf]

**Table S-10. Estimation of phenotypic variance explained by additive genetic variance of the included SNPs.**

| Condition            | Prevalence | V(G)     |       | Vp       |       | V(G)/Vp  |       | V(G)/Vp_L    |       | P-val   | n    |
|----------------------|------------|----------|-------|----------|-------|----------|-------|--------------|-------|---------|------|
|                      |            | Estimate | SE    | Estimate | SE    | Estimate | SE    | Estimate     | SE    |         |      |
| Allergic rhinitis    | 0.25       | 0.013    | 0.009 | 0.250    | 0.004 | 0.054    | 0.036 | <b>0.075</b> | 0.050 | 6.2E-02 | 8058 |
| Asthma               | 0.15       | 0.031    | 0.009 | 0.250    | 0.004 | 0.125    | 0.036 | <b>0.149</b> | 0.043 | 3.3E-05 | 8012 |
| Cardiac disease      | 0.25       | 0.021    | 0.009 | 0.250    | 0.004 | 0.085    | 0.037 | <b>0.119</b> | 0.051 | 6.4E-03 | 7916 |
| Depression           | 0.15       | 0.009    | 0.009 | 0.250    | 0.004 | 0.038    | 0.036 | <b>0.045</b> | 0.042 | 1.4E-01 | 7953 |
| Dermatophytosis      | 0.15       | 0.007    | 0.009 | 0.250    | 0.004 | 0.030    | 0.034 | <b>0.036</b> | 0.041 | 1.8E-01 | 8079 |
| Diabetes, type 2     | 0.15       | 0.051    | 0.010 | 0.250    | 0.004 | 0.206    | 0.039 | <b>0.246</b> | 0.046 | 6.2E-09 | 7987 |
| Dyslipidaemia        | 0.55       | 0.017    | 0.009 | 0.250    | 0.004 | 0.069    | 0.037 | <b>0.107</b> | 0.057 | 2.7E-02 | 7915 |
| Hemorrhoids          | 0.15       | 0.012    | 0.009 | 0.250    | 0.004 | 0.047    | 0.036 | <b>0.057</b> | 0.043 | 8.6E-02 | 7998 |
| Hypertensive disease | 0.50       | 0.018    | 0.009 | 0.250    | 0.004 | 0.071    | 0.035 | <b>0.111</b> | 0.055 | 1.4E-02 | 8109 |
| Osteoarthritis       | 0.40       | 0.006    | 0.009 | 0.250    | 0.004 | 0.024    | 0.035 | <b>0.037</b> | 0.054 | 2.5E-01 | 7998 |

**V(G)**: Genetic variance. **Vp**: Phenotypic variance. **V(G)/Vp**: Genetic variance over the phenotypic variance (variance explained). **V(G)/Vp\_L** (emphasized in bold): Variance explained when transformed from the observed scale to the underlying scale (based on the prevalence estimate). **P-val**: P-value for a likelihood ratio test comparing full and reduced models with and without the genetic variance component. Residual variance estimates are not shown. **n**: Total number of subjects included for each analysis. Approximately 300,000 SNPs were included in each analysis (see **Table S-3** for precise numbers).
