# Supplementary material for: Exhaustive Genome-Wide Search for SNP-SNP Interactions Across 10 Human Diseases
Source: PubMed Central journal article supplement (PMC4938657; doi:10.1534/g3.116.028563), 2016-05-12
Supplement: supp_g3.116.028563_TableS11.pdf [file supp_g3.116.028563_TableS11.pdf]

**Explanation for Tables S-11 through S-20:**

These tables present either the top 10 most significant marginal associations, or all genome-wide significant marginal associations, for the ten outcome conditions. SNPs were ranked by significance in the adjusted discovery analysis. **A1**: non-referent allele. **A0**: referent allele. **OR**: odds ratio; **CI**: confidence interval. **P**: P-value. **Genome-wide sig.?** Whether or not the P-value from the discovery adjusted analysis was less than  $10^{-7}$ . **Rep?** Whether or not the marginal effect was nominally replicated. **Annotation**: Annotation assigned to the respective SNP, coded as follows: EX, exonic; R, regulatory; D, disease-gene; Q, disease-eQTL; G, any-gene. Marginal annotations (M) are not listed, since all SNPs in these tables would have that annotation. Green shading indicates genome-wide significant or replicated.

**Table S-11. Top 10 most significant marginal associations, allergic rhinitis.**

| RSID       | Chr | Position  | A1 | A0 | Discovery, unadjusted |          | Discovery, adjusted |          | Replication, adjusted |          | Genome-wide sig.? | Replicated? | Annotation   | Gene    |
|------------|-----|-----------|----|----|-----------------------|----------|---------------------|----------|-----------------------|----------|-------------------|-------------|--------------|---------|
|            |     |           |    |    | OR (95% CI)           | P        | OR (95% CI)         | P        | OR (95% CI)           | P        |                   |             |              |         |
| rs2160203  | 2   | 102960824 | G  | A  | 0.90 (0.87, 0.94)     | 6.61E-08 | 0.90 (0.87, 0.94)   | 5.75E-08 | 0.93 (0.82, 1.05)     | 2.16E-01 | Yes               | No          | R, D, G,     | IL1RL1  |
| rs34624588 | 5   | 110452316 | -  | T  | 0.92 (0.89, 0.95)     | 1.25E-07 | 0.92 (0.89, 0.95)   | 1.11E-07 | 0.95 (0.85, 1.05)     | 2.95E-01 | No                | No          | G,           | WDR36   |
| rs3806933  | 5   | 110406742 | T  | C  | 0.92 (0.89, 0.95)     | 1.50E-07 | 0.92 (0.89, 0.95)   | 1.17E-07 | 0.96 (0.87, 1.07)     | 4.66E-01 | No                | No          | D, G,        | TSLP    |
| rs4988956  | 2   | 102968007 | A  | G  | 0.91 (0.89, 0.95)     | 9.61E-08 | 0.92 (0.89, 0.95)   | 1.21E-07 | 0.94 (0.84, 1.04)     | 2.10E-01 | No                | No          | EX, R, D, G, | IL1RL1  |
| rs10173193 | 2   | 102975050 | A  | G  | 0.92 (0.89, 0.95)     | 1.81E-07 | 0.92 (0.89, 0.95)   | 2.15E-07 | 0.94 (0.84, 1.04)     | 1.93E-01 | No                | No          | G,           | IL18R1  |
| rs10206753 | 2   | 102968362 | C  | T  | 0.92 (0.89, 0.95)     | 1.73E-07 | 0.92 (0.89, 0.95)   | 2.25E-07 | 0.94 (0.84, 1.04)     | 2.36E-01 | No                | No          | EX, D, G,    | IL1RL1  |
| rs10192036 | 2   | 102968211 | A  | C  | 0.92 (0.89, 0.95)     | 2.05E-07 | 0.92 (0.89, 0.95)   | 2.65E-07 | 0.94 (0.84, 1.05)     | 2.53E-01 | No                | No          | EX, D, G,    | IL1RL1  |
| rs1438673  | 5   | 110467499 | C  | T  | 1.09 (1.05, 1.12)     | 4.91E-07 | 1.09 (1.05, 1.12)   | 3.75E-07 | 1.04 (0.93, 1.15)     | 5.23E-01 | No                | No          | G,           | WDR36   |
| rs1592459  | 2   | 103031569 | G  | A  | 0.92 (0.89, 0.95)     | 5.41E-07 | 0.92 (0.89, 0.95)   | 7.61E-07 | 0.98 (0.88, 1.09)     | 6.92E-01 | No                | No          | G,           | IL18RAP |
| rs6710528  | 2   | 103016142 | T  | C  | 0.92 (0.89, 0.95)     | 6.85E-07 | 0.92 (0.89, 0.95)   | 9.56E-07 | 0.98 (0.88, 1.08)     | 5.80E-01 | No                | No          | G,           | IL18R1  |
