# Supplementary material for: Exhaustive Genome-Wide Search for SNP-SNP Interactions Across 10 Human Diseases
Source: PubMed Central journal article supplement (PMC4938657; doi:10.1534/g3.116.028563), 2016-05-12
Supplement: supp_g3.116.028563_TableS12.pdf [file supp_g3.116.028563_TableS12.pdf]

**Table S-12. All genome-wide significant marginal associations, asthma.**

| RSID           | Chr | Position | A1 | A0 | Discovery, unadjusted |          | Discovery, adjusted |          | Replication, adjusted |          | Genome-wide sig.? | Replicated? | Annotation  | Gene     |
|----------------|-----|----------|----|----|-----------------------|----------|---------------------|----------|-----------------------|----------|-------------------|-------------|-------------|----------|
|                |     |          |    |    | OR (95% CI)           | P        | OR (95% CI)         | P        | OR (95% CI)           | P        |                   |             |             |          |
| rs17612802     | 6   | 32620359 | C  | T  | 0.87 (0.83, 0.90)     | 6.01E-13 | 0.86 (0.83, 0.90)   | 2.46E-13 | 0.84 (0.76, 0.94)     | 1.81E-03 | Yes               | Yes         |             |          |
| rs9273304      | 6   | 32622923 | G  | A  | 0.87 (0.84, 0.90)     | 6.77E-13 | 0.87 (0.83, 0.90)   | 2.53E-13 | 0.84 (0.76, 0.93)     | 1.15E-03 | Yes               | Yes         | D, Q, G,    | HLA-DQB1 |
| rs1063355      | 6   | 32627714 | T  | G  | 0.87 (0.84, 0.90)     | 7.07E-13 | 0.87 (0.83, 0.90)   | 2.73E-13 | 0.84 (0.76, 0.94)     | 1.83E-03 | Yes               | Yes         | R, D, Q, G, | HLA-DQB1 |
| b37:6:32624786 | 6   | 32624786 | T  | G  | 0.87 (0.83, 0.90)     | 8.19E-13 | 0.87 (0.83, 0.90)   | 3.47E-13 | 0.84 (0.76, 0.94)     | 1.53E-03 | Yes               | Yes         | D, G,       | HLA-DQB1 |
| rs9272656      | 6   | 32608629 | A  | G  | 0.87 (0.84, 0.90)     | 1.82E-12 | 0.87 (0.83, 0.90)   | 5.71E-13 | 0.84 (0.75, 0.93)     | 1.02E-03 | Yes               | Yes         | D, Q, G,    | HLA-DQA1 |
| rs9273215      | 6   | 32613712 | G  | A  | 0.87 (0.84, 0.90)     | 1.63E-12 | 0.87 (0.83, 0.90)   | 6.00E-13 | 0.84 (0.76, 0.93)     | 1.23E-03 | Yes               | Yes         | D, G,       | HLA-DQA1 |
| rs17612583     | 6   | 32615470 | G  | A  | 0.87 (0.84, 0.90)     | 2.03E-12 | 0.87 (0.84, 0.90)   | 7.71E-13 | 0.84 (0.76, 0.93)     | 1.17E-03 | Yes               | Yes         | D, G,       | HLA-DQA1 |
| rs17612576     | 6   | 32615458 | G  | A  | 0.87 (0.84, 0.91)     | 2.31E-12 | 0.87 (0.84, 0.90)   | 8.73E-13 | 0.84 (0.76, 0.94)     | 1.49E-03 | Yes               | Yes         | D, G,       | HLA-DQA1 |
| rs9273021      | 6   | 32611725 | A  | G  | 0.87 (0.84, 0.91)     | 2.56E-12 | 0.87 (0.84, 0.90)   | 9.65E-13 | 0.84 (0.76, 0.93)     | 1.28E-03 | Yes               | Yes         | D, G,       | HLA-DQA1 |
| rs9273514      | 6   | 32628538 | G  | T  | 0.87 (0.84, 0.91)     | 3.15E-12 | 0.87 (0.84, 0.90)   | 1.00E-12 | 0.85 (0.77, 0.94)     | 2.29E-03 | Yes               | Yes         | D, Q, G,    | HLA-DQB1 |
| rs9273329      | 6   | 32623242 | G  | A  | 0.87 (0.84, 0.91)     | 2.99E-12 | 0.87 (0.84, 0.90)   | 1.14E-12 | 0.84 (0.76, 0.94)     | 1.32E-03 | Yes               | Yes         | R, D, Q, G, | HLA-DQB1 |
| rs17843605     | 6   | 32620391 | G  | T  | 0.87 (0.84, 0.91)     | 3.28E-12 | 0.87 (0.84, 0.90)   | 1.26E-12 | 0.84 (0.76, 0.93)     | 1.19E-03 | Yes               | Yes         |             |          |
| rs17612510     | 6   | 32614883 | C  | T  | 0.87 (0.84, 0.91)     | 3.72E-12 | 0.87 (0.84, 0.90)   | 1.31E-12 | 0.84 (0.76, 0.93)     | 1.30E-03 | Yes               | Yes         | D, G,       | HLA-DQA1 |
| rs9274177      | 6   | 32630407 | A  | G  | 0.87 (0.84, 0.91)     | 8.89E-12 | 0.87 (0.84, 0.90)   | 2.21E-12 | 0.85 (0.77, 0.95)     | 2.74E-03 | Yes               | Yes         | D, G,       | HLA-DQB1 |
| rs17843577     | 6   | 32615510 | C  | T  | 0.87 (0.84, 0.91)     | 6.77E-12 | 0.87 (0.84, 0.91)   | 2.48E-12 | 0.84 (0.76, 0.93)     | 1.12E-03 | Yes               | Yes         | D, G,       | HLA-DQA1 |
| rs9271176      | 6   | 32578127 | A  | G  | 0.87 (0.84, 0.91)     | 3.81E-11 | 0.87 (0.83, 0.91)   | 1.59E-11 | 0.91 (0.82, 1.02)     | 1.14E-01 | Yes               | No          | Q,          |          |
| rs9274684      | 6   | 32636785 | T  | C  | 1.12 (1.07, 1.16)     | 9.65E-09 | 1.13 (1.08, 1.17)   | 8.20E-10 | 1.09 (0.98, 1.20)     | 1.15E-01 | Yes               | No          | D, Q, G,    | HLA-DQB1 |
| rs7755212      | 6   | 32441408 | C  | T  | 0.89 (0.85, 0.92)     | 6.55E-10 | 0.89 (0.85, 0.92)   | 9.47E-10 | 0.88 (0.79, 0.98)     | 1.68E-02 | Yes               | Yes         | R, Q,       |          |
| rs9268893      | 6   | 32431927 | C  | T  | 0.89 (0.86, 0.92)     | 1.75E-09 | 0.89 (0.86, 0.92)   | 2.58E-09 | 0.89 (0.81, 0.99)     | 3.89E-02 | Yes               | Yes         |             |          |
| rs9268877      | 6   | 32431147 | A  | G  | 0.89 (0.86, 0.92)     | 2.13E-09 | 0.89 (0.86, 0.93)   | 2.95E-09 | 0.89 (0.80, 0.99)     | 3.27E-02 | Yes               | Yes         | Q,          |          |
| rs5026743      | 6   | 32439964 | G  | T  | 0.89 (0.86, 0.93)     | 3.47E-09 | 0.89 (0.86, 0.93)   | 4.73E-09 | 0.89 (0.80, 0.99)     | 2.78E-02 | Yes               | Yes         | Q,          |          |
| rs9275123      | 6   | 32650256 | G  | T  | 0.90 (0.87, 0.94)     | 9.41E-08 | 0.89 (0.86, 0.93)   | 4.93E-09 | 0.92 (0.84, 1.03)     | 1.56E-01 | Yes               | No          |             |          |
| rs9268979      | 6   | 32435044 | T  | C  | 0.89 (0.86, 0.93)     | 4.51E-09 | 0.89 (0.86, 0.93)   | 6.48E-09 | 0.88 (0.80, 0.98)     | 2.21E-02 | Yes               | Yes         |             |          |
| rs9275071      | 6   | 32648490 | G  | A  | 0.90 (0.87, 0.94)     | 1.33E-07 | 0.89 (0.86, 0.93)   | 7.30E-09 | 0.93 (0.84, 1.03)     | 1.83E-01 | Yes               | No          |             |          |
| rs4642516      | 6   | 32657543 | G  | T  | 0.90 (0.87, 0.94)     | 1.37E-07 | 0.89 (0.86, 0.93)   | 7.60E-09 | 0.92 (0.84, 1.03)     | 1.47E-01 | Yes               | No          | R, Q,       |          |
| rs9275086      | 6   | 32648809 | A  | G  | 0.90 (0.87, 0.94)     | 1.39E-07 | 0.89 (0.86, 0.93)   | 7.66E-09 | 0.93 (0.84, 1.03)     | 1.67E-01 | Yes               | No          |             |          |
| rs7739357      | 6   | 32441641 | A  | G  | 0.89 (0.86, 0.93)     | 9.68E-09 | 0.89 (0.86, 0.93)   | 1.20E-08 | 0.89 (0.81, 1.00)     | 4.39E-02 | Yes               | Yes         | R, Q,       |          |
| rs521539       | 6   | 32581973 | A  | G  | 1.14 (1.09, 1.20)     | 9.66E-09 | 1.14 (1.09, 1.20)   | 1.24E-08 | 1.11 (0.98, 1.26)     | 9.99E-02 | Yes               | No          |             |          |
| rs9274733      | 6   | 32637874 | C  | T  | 0.91 (0.87, 0.94)     | 2.38E-07 | 0.90 (0.86, 0.93)   | 1.25E-08 | 0.93 (0.85, 1.04)     | 2.10E-01 | Yes               | No          | D, Q, G,    | HLA-DQB1 |
| rs9269080      | 6   | 32440969 | G  | A  | 0.89 (0.86, 0.93)     | 9.20E-09 | 0.90 (0.86, 0.93)   | 1.47E-08 | 0.90 (0.81, 1.00)     | 4.12E-02 | Yes               | Yes         | Q,          |          |
| rs9275146      | 6   | 32651495 | G  | T  | 0.91 (0.87, 0.94)     | 2.69E-07 | 0.90 (0.86, 0.93)   | 1.47E-08 | 0.93 (0.84, 1.03)     | 1.73E-01 | Yes               | No          |             |          |
| rs9268833      | 6   | 32428062 | T  | C  | 1.12 (1.08, 1.17)     | 1.68E-08 | 1.12 (1.08, 1.17)   | 1.97E-08 | 1.17 (1.05, 1.31)     | 3.93E-03 | Yes               | Yes         | R, Q,       |          |
| rs34965214     | 6   | 32609545 | T  | C  | 1.15 (1.09, 1.20)     | 1.35E-08 | 1.15 (1.09, 1.20)   | 2.19E-08 | 1.18 (1.04, 1.35)     | 9.88E-03 | Yes               | Yes         | D, Q, G,    | HLA-DQA1 |
| rs9271544      | 6   | 32590120 | A  | C  | 1.12 (1.08, 1.17)     | 1.12E-08 | 1.12 (1.08, 1.17)   | 2.53E-08 | 1.12 (1.01, 1.26)     | 2.82E-02 | Yes               | Yes         | Q,          |          |
| rs9271432      | 6   | 32588056 | T  | C  | 1.12 (1.08, 1.17)     | 9.81E-09 | 1.12 (1.08, 1.17)   | 2.55E-08 | 1.14 (1.03, 1.28)     | 1.27E-02 | Yes               | Yes         |             |          |
| rs660895       | 6   | 32577380 | G  | A  | 1.14 (1.09, 1.20)     | 2.26E-08 | 1.14 (1.09, 1.20)   | 2.71E-08 | 1.12 (0.98, 1.26)     | 1.06E-01 | Yes               | No          | R, Q,       |          |
| rs9268835      | 6   | 32428115 | A  | G  | 1.12 (1.08, 1.17)     | 2.49E-08 | 1.12 (1.08, 1.17)   | 3.02E-08 | 1.16 (1.05, 1.30)     | 5.32E-03 | Yes               | Yes         | Q,          |          |
| rs9271488      | 6   | 32589000 | T  | G  | 1.12 (1.08, 1.17)     | 1.30E-08 | 1.12 (1.08, 1.17)   | 3.10E-08 | 1.14 (1.03, 1.28)     | 1.44E-02 | Yes               | Yes         |             |          |
| rs3104371      | 6   | 32602137 | G  | C  | 1.15 (1.09, 1.20)     | 2.37E-08 | 1.14 (1.09, 1.20)   | 3.31E-08 | 1.16 (1.02, 1.32)     | 2.34E-02 | Yes               | Yes         | D, Q, G,    | HLA-DQA1 |
| rs9272319      | 6   | 32604108 | C  | T  | 1.12 (1.08, 1.17)     | 1.47E-08 | 1.12 (1.08, 1.16)   | 3.43E-08 | 1.13 (1.02, 1.27)     | 2.07E-02 | Yes               | Yes         | D, Q, G,    | HLA-DQA1 |
| rs9271170      | 6   | 32577889 | T  | C  | 0.89 (0.85, 0.93)     | 1.58E-07 | 0.89 (0.85, 0.92)   | 3.84E-08 | 0.92 (0.83, 1.04)     | 2.02E-01 | Yes               | No          | R, Q,       |          |

**Table S-12. All genome-wide significant marginal associations, asthma (continued).**

| RSID       | Chr | Position | A1 | A0 | Discovery, unadjusted |          | Discovery, adjusted |          | Replication, adjusted |          | Genome-wide sig.? | Replicated? | Annotation  | Gene     |
|------------|-----|----------|----|----|-----------------------|----------|---------------------|----------|-----------------------|----------|-------------------|-------------|-------------|----------|
|            |     |          |    |    | OR (95% CI)           | P        | OR (95% CI)         | P        | OR (95% CI)           | P        |                   |             |             |          |
| rs9271472  | 6   | 32588700 | T  | C  | 1.12 (1.08, 1.17)     | 1.59E-08 | 1.12 (1.08, 1.16)   | 3.85E-08 | 1.13 (1.02, 1.27)     | 1.82E-02 | Yes               | Yes         |             |          |
| rs9271769  | 6   | 32594217 | T  | G  | 1.12 (1.08, 1.17)     | 1.65E-08 | 1.12 (1.07, 1.16)   | 3.95E-08 | 1.13 (1.02, 1.27)     | 2.10E-02 | Yes               | Yes         | Q,          |          |
| rs522308   | 6   | 32581922 | T  | C  | 1.12 (1.08, 1.17)     | 1.42E-08 | 1.12 (1.08, 1.17)   | 4.03E-08 | 1.17 (1.06, 1.32)     | 3.56E-03 | Yes               | Yes         |             |          |
| rs9273062  | 6   | 32612161 | A  | C  | 1.12 (1.08, 1.17)     | 1.71E-08 | 1.12 (1.07, 1.16)   | 4.32E-08 | 1.14 (1.03, 1.27)     | 1.60E-02 | Yes               | Yes         | D, G,       | HLA-DQA1 |
| rs9271470  | 6   | 32588662 | T  | C  | 1.12 (1.08, 1.17)     | 1.89E-08 | 1.12 (1.07, 1.16)   | 4.64E-08 | 1.14 (1.03, 1.27)     | 1.59E-02 | Yes               | Yes         |             |          |
| rs1391371  | 6   | 32603798 | T  | A  | 1.14 (1.09, 1.20)     | 3.01E-08 | 1.14 (1.09, 1.20)   | 4.67E-08 | 1.19 (1.05, 1.35)     | 7.40E-03 | Yes               | Yes         | D, Q, G,    | HLA-DQA1 |
| rs41269955 | 6   | 32608269 | A  | G  | 1.15 (1.09, 1.21)     | 2.63E-08 | 1.15 (1.09, 1.20)   | 4.80E-08 | 1.18 (1.03, 1.34)     | 1.84E-02 | Yes               | Yes         | D, Q, G,    | HLA-DQA1 |
| rs9272485  | 6   | 32605972 | G  | A  | 1.12 (1.08, 1.17)     | 2.17E-08 | 1.12 (1.07, 1.16)   | 5.49E-08 | 1.13 (1.02, 1.27)     | 2.22E-02 | Yes               | Yes         | R, D, Q, G, | HLA-DQA1 |
| rs9270839  | 6   | 32570375 | A  | C  | 0.89 (0.85, 0.93)     | 1.84E-07 | 0.89 (0.85, 0.93)   | 5.62E-08 | 0.90 (0.81, 1.02)     | 1.14E-01 | Yes               | No          | Q,          |          |
| rs9271101  | 6   | 32576493 | C  | T  | 0.89 (0.85, 0.93)     | 1.83E-07 | 0.89 (0.85, 0.93)   | 6.06E-08 | 0.92 (0.83, 1.05)     | 2.26E-01 | Yes               | No          | Q,          |          |
| rs601945   | 6   | 32573415 | G  | A  | 1.15 (1.09, 1.21)     | 3.30E-08 | 1.15 (1.09, 1.20)   | 6.14E-08 | 1.18 (1.03, 1.34)     | 1.58E-02 | Yes               | Yes         |             |          |
| rs9270901  | 6   | 32571933 | C  | A  | 0.89 (0.85, 0.93)     | 1.91E-07 | 0.89 (0.85, 0.93)   | 6.26E-08 | 0.90 (0.81, 1.02)     | 1.19E-01 | Yes               | No          | Q,          |          |
| rs9270850  | 6   | 32570717 | G  | A  | 0.89 (0.85, 0.93)     | 1.99E-07 | 0.89 (0.85, 0.93)   | 6.48E-08 | 0.91 (0.82, 1.04)     | 1.71E-01 | Yes               | No          | Q,          |          |
| rs9270935  | 6   | 32572701 | A  | G  | 0.89 (0.85, 0.93)     | 2.15E-07 | 0.89 (0.85, 0.93)   | 6.98E-08 | 0.91 (0.82, 1.04)     | 1.75E-01 | Yes               | No          | Q,          |          |
| rs73727334 | 6   | 32570667 | A  | G  | 0.89 (0.86, 0.93)     | 2.36E-07 | 0.89 (0.85, 0.93)   | 7.03E-08 | 0.91 (0.82, 1.03)     | 1.47E-01 | Yes               | No          | Q,          |          |
| rs7649348  | 3   | 49772375 | G  | A  | 1.11 (1.07, 1.15)     | 3.49E-08 | 1.11 (1.07, 1.15)   | 7.66E-08 | 1.05 (0.95, 1.17)     | 2.98E-01 | Yes               | No          | G,          | IP6K1    |
| rs9271092  | 6   | 32576296 | A  | G  | 0.89 (0.85, 0.93)     | 2.40E-07 | 0.89 (0.85, 0.93)   | 8.10E-08 | 0.91 (0.82, 1.04)     | 1.68E-01 | Yes               | No          | Q,          |          |
| rs9271090  | 6   | 32576247 | T  | C  | 0.89 (0.86, 0.93)     | 2.44E-07 | 0.89 (0.85, 0.93)   | 8.12E-08 | 0.91 (0.82, 1.04)     | 1.68E-01 | Yes               | No          | Q,          |          |
| rs9271644  | 6   | 32592337 | A  | G  | 1.12 (1.08, 1.17)     | 3.02E-08 | 1.12 (1.07, 1.16)   | 8.22E-08 | 1.14 (1.03, 1.29)     | 1.10E-02 | Yes               | Yes         | Q,          |          |
| rs9270979  | 6   | 32573780 | A  | G  | 0.89 (0.86, 0.93)     | 2.61E-07 | 0.89 (0.85, 0.93)   | 8.71E-08 | 0.91 (0.81, 1.03)     | 1.31E-01 | Yes               | No          |             |          |
| rs9270949  | 6   | 32572975 | T  | C  | 0.89 (0.86, 0.93)     | 2.66E-07 | 0.89 (0.85, 0.93)   | 8.74E-08 | 0.91 (0.82, 1.04)     | 1.72E-01 | Yes               | No          | Q,          |          |
| rs9271469  | 6   | 32588630 | C  | T  | 1.12 (1.08, 1.16)     | 3.61E-08 | 1.12 (1.07, 1.16)   | 8.87E-08 | 1.13 (1.02, 1.27)     | 2.06E-02 | Yes               | Yes         |             |          |
| rs9271198  | 6   | 32578726 | G  | A  | 0.89 (0.86, 0.93)     | 2.79E-07 | 0.89 (0.85, 0.93)   | 9.18E-08 | 0.92 (0.83, 1.05)     | 2.25E-01 | Yes               | No          | Q,          |          |
| rs9270873  | 6   | 32571201 | G  | A  | 0.89 (0.86, 0.93)     | 2.78E-07 | 0.89 (0.85, 0.93)   | 9.21E-08 | 0.91 (0.82, 1.04)     | 1.68E-01 | Yes               | No          | Q,          |          |
| rs9270933  | 6   | 32572659 | C  | G  | 0.89 (0.86, 0.93)     | 2.98E-07 | 0.89 (0.85, 0.93)   | 9.29E-08 | 0.91 (0.82, 1.04)     | 1.73E-01 | Yes               | No          | Q,          |          |
| rs9271163  | 6   | 32577733 | C  | T  | 0.89 (0.86, 0.93)     | 2.58E-07 | 0.89 (0.85, 0.93)   | 9.41E-08 | 0.90 (0.81, 1.02)     | 1.21E-01 | Yes               | No          | Q,          |          |
| rs9271109  | 6   | 32576687 | T  | C  | 0.89 (0.86, 0.93)     | 3.01E-07 | 0.89 (0.85, 0.93)   | 9.63E-08 | 0.91 (0.82, 1.03)     | 1.48E-01 | Yes               | No          | Q,          |          |
| rs11709680 | 3   | 49745188 | C  | T  | 1.11 (1.07, 1.16)     | 4.81E-08 | 1.11 (1.07, 1.15)   | 9.83E-08 | 1.04 (0.94, 1.15)     | 4.76E-01 | Yes               | No          | G,          | RNF123   |
