# Supplementary material for: Exhaustive Genome-Wide Search for SNP-SNP Interactions Across 10 Human Diseases
Source: PubMed Central journal article supplement (PMC4938657; doi:10.1534/g3.116.028563), 2016-05-12
Supplement: supp_g3.116.028563_TableS13.pdf [file supp_g3.116.028563_TableS13.pdf]

**Table S-13. Top 10 most significant marginal associations, cardiac disease.**

| RSID       | Chr | Position  | A1 | A0 | Discovery, unadjusted |          | Discovery, adjusted |          | Replication, adjusted |          | Genome-wide sig.? | Replicated? | Annotation | Gene     |
|------------|-----|-----------|----|----|-----------------------|----------|---------------------|----------|-----------------------|----------|-------------------|-------------|------------|----------|
|            |     |           |    |    | OR (95% CI)           | P        | OR (95% CI)         | P        | OR (95% CI)           | P        |                   |             |            |          |
| rs6843082  | 4   | 111718067 | G  | A  | 1.06 (1.02, 1.10)     | 4.57E-03 | 1.11 (1.07, 1.16)   | 7.41E-07 | 0.97 (0.86, 1.13)     | 8.51E-01 | No                | No          |            |          |
| rs7558074  | 2   | 99992822  | A  | C  | 0.94 (0.91, 0.97)     | 2.14E-04 | 0.92 (0.89, 0.95)   | 3.04E-06 | 0.93 (0.82, 1.03)     | 1.28E-01 | No                | No          | G,         | EIF5B    |
| rs2723334  | 4   | 111688752 | T  | C  | 1.05 (1.01, 1.09)     | 1.36E-02 | 1.11 (1.06, 1.15)   | 3.36E-06 | 0.98 (0.87, 1.14)     | 9.59E-01 | No                | No          |            |          |
| rs6714244  | 2   | 100105312 | A  | G  | 0.94 (0.91, 0.97)     | 2.54E-04 | 0.92 (0.89, 0.95)   | 4.59E-06 | 0.93 (0.83, 1.03)     | 1.70E-01 | No                | No          | R, G,      | REV1     |
| rs13236941 | 7   | 94955820  | T  | C  | 0.92 (0.88, 0.96)     | 9.01E-05 | 0.90 (0.85, 0.94)   | 5.24E-06 | 1.02 (0.85, 1.16)     | 9.45E-01 | No                | No          | D, G,      | PON1     |
| rs2392991  | 10  | 57954930  | A  | C  | 1.08 (1.04, 1.11)     | 3.39E-06 | 1.09 (1.05, 1.12)   | 5.50E-06 | 0.92 (0.79, 1.00)     | 4.55E-02 | No                | No          |            |          |
| rs28628093 | 15  | 94333190  | A  | C  | 1.05 (1.02, 1.09)     | 1.39E-03 | 1.09 (1.05, 1.13)   | 5.55E-06 | 0.94 (0.83, 1.05)     | 2.78E-01 | No                | No          | G,         | BC037497 |
| rs7903175  | 10  | 123105123 | T  | C  | 0.93 (0.90, 0.97)     | 1.16E-04 | 0.91 (0.88, 0.95)   | 5.90E-06 | 0.98 (0.87, 1.12)     | 8.61E-01 | No                | No          |            |          |
| rs2393047  | 10  | 58046350  | G  | A  | 1.07 (1.04, 1.11)     | 2.60E-05 | 1.09 (1.05, 1.12)   | 9.78E-06 | 0.96 (0.83, 1.05)     | 2.32E-01 | No                | No          |            |          |
| rs10225710 | 7   | 22142742  | T  | C  | 0.93 (0.90, 0.96)     | 1.00E-05 | 0.92 (0.89, 0.96)   | 1.00E-05 | 1.01 (0.92, 1.16)     | 6.05E-01 | No                | No          |            |          |
