# Supplementary material for: Exhaustive Genome-Wide Search for SNP-SNP Interactions Across 10 Human Diseases
Source: PubMed Central journal article supplement (PMC4938657; doi:10.1534/g3.116.028563), 2016-05-12
Supplement: supp_g3.116.028563_TableS14.pdf [file supp_g3.116.028563_TableS14.pdf]

**Table S-14. Top 10 most significant marginal associations, depression.**

| RSID       | Chr | Position  | A1 | A0 | Discovery, unadjusted |          | Discovery, adjusted |          | Replication, adjusted |          | Genome-wide sig.? | Replicated? | Annotation | Gene      |
|------------|-----|-----------|----|----|-----------------------|----------|---------------------|----------|-----------------------|----------|-------------------|-------------|------------|-----------|
|            |     |           |    |    | OR (95% CI)           | P        | OR (95% CI)         | P        | OR (95% CI)           | P        |                   |             |            |           |
| rs7797095  | 7   | 86567364  | T  | C  | 1.13 (1.07, 1.19)     | 1.12E-05 | 1.14 (1.08, 1.20)   | 4.11E-06 | 0.94 (0.82, 1.09)     | 4.18E-01 | No                | No          | G,         | KIAA1324L |
| rs12704297 | 7   | 86546982  | C  | T  | 1.13 (1.07, 1.19)     | 1.66E-05 | 1.14 (1.07, 1.20)   | 5.96E-06 | N/A                   | N/A      | No                | No          | G,         | KIAA1324L |
| rs2396431  | 2   | 227765488 | A  | G  | 1.10 (1.05, 1.15)     | 2.06E-05 | 1.10 (1.06, 1.15)   | 8.87E-06 | 1.01 (0.89, 1.10)     | 8.82E-01 | No                | No          | G,         | RHBDD1    |
| rs2217359  | 2   | 227759892 | T  | C  | 1.10 (1.05, 1.15)     | 2.21E-05 | 1.10 (1.06, 1.15)   | 9.85E-06 | 1.00 (0.88, 1.09)     | 7.20E-01 | No                | No          | G,         | RHBDD1    |
| rs11933869 | 4   | 161763436 | A  | G  | 0.88 (0.83, 0.93)     | 3.24E-05 | 0.87 (0.82, 0.93)   | 1.19E-05 | 1.06 (0.90, 1.20)     | 5.83E-01 | No                | No          |            |           |
| rs4675115  | 2   | 227769123 | G  | C  | 1.10 (1.05, 1.14)     | 3.79E-05 | 1.10 (1.06, 1.15)   | 1.25E-05 | N/A                   | N/A      | No                | No          | G,         | RHBDD1    |
| rs7592387  | 2   | 227777095 | G  | A  | 1.10 (1.05, 1.14)     | 3.43E-05 | 1.10 (1.05, 1.15)   | 1.27E-05 | 0.99 (0.88, 1.09)     | 6.67E-01 | No                | No          | G,         | RHBDD1    |
| rs2396432  | 2   | 227765891 | T  | C  | 1.10 (1.05, 1.14)     | 3.17E-05 | 1.10 (1.05, 1.15)   | 1.40E-05 | 1.01 (0.89, 1.10)     | 8.57E-01 | No                | No          | R, G,      | RHBDD1    |
| rs10933161 | 2   | 227764872 | G  | A  | 1.10 (1.05, 1.14)     | 3.39E-05 | 1.10 (1.05, 1.15)   | 1.46E-05 | 1.01 (0.90, 1.11)     | 9.54E-01 | No                | No          | G,         | RHBDD1    |
| rs3820928  | 2   | 227773466 | C  | T  | 1.10 (1.05, 1.14)     | 3.98E-05 | 1.10 (1.05, 1.15)   | 1.47E-05 | 1.00 (0.88, 1.09)     | 7.26E-01 | No                | No          | R, G,      | RHBDD1    |
