# Supplementary material for: Exhaustive Genome-Wide Search for SNP-SNP Interactions Across 10 Human Diseases
Source: PubMed Central journal article supplement (PMC4938657; doi:10.1534/g3.116.028563), 2016-05-12
Supplement: supp_g3.116.028563_TableS15.pdf [file supp_g3.116.028563_TableS15.pdf]

**Table S-15. Top 10 most significant marginal associations, dermatophytosis.**

| RSID       | Chr | Position  | A1 | A0 | Discovery, unadjusted |          | Discovery, adjusted |          | Replication, adjusted |          | Genome-wide sig.? | Replicated? | Annotation | Gene    |
|------------|-----|-----------|----|----|-----------------------|----------|---------------------|----------|-----------------------|----------|-------------------|-------------|------------|---------|
|            |     |           |    |    | OR (95% CI)           | P        | OR (95% CI)         | P        | OR (95% CI)           | P        |                   |             |            |         |
| rs35626362 | 4   | 121583673 | T  | C  | 0.90 (0.86, 0.94)     | 2.43E-05 | 0.89 (0.85, 0.94)   | 1.12E-05 | 1.05 (0.93, 1.19)     | 3.92E-01 | No                | No          |            |         |
| rs34769609 | 4   | 121551435 | C  | -  | 0.90 (0.86, 0.94)     | 2.51E-05 | 0.89 (0.85, 0.94)   | 1.25E-05 | 1.05 (0.94, 1.19)     | 3.82E-01 | No                | No          |            |         |
| rs2072542  | 12  | 22440315  | G  | A  | 1.11 (1.06, 1.15)     | 1.21E-06 | 1.10 (1.05, 1.15)   | 1.32E-05 | 1.01 (0.91, 1.12)     | 8.98E-01 | No                | No          | G,         | ST8SIA1 |
| rs908132   | 2   | 102093096 | A  | G  | 0.92 (0.88, 0.96)     | 7.89E-05 | 0.91 (0.87, 0.95)   | 1.82E-05 | 0.97 (0.86, 1.07)     | 5.03E-01 | No                | No          | G,         | RFX8    |
| rs35513623 | 4   | 121579530 | T  | C  | 0.90 (0.86, 0.95)     | 4.08E-05 | 0.90 (0.85, 0.94)   | 1.97E-05 | 1.05 (0.93, 1.18)     | 4.26E-01 | No                | No          |            |         |
| rs6814315  | 4   | 39793385  | T  | G  | 1.09 (1.05, 1.14)     | 2.77E-05 | 1.10 (1.05, 1.14)   | 2.40E-05 | 1.01 (0.92, 1.12)     | 7.76E-01 | No                | No          |            |         |
| rs4805005  | 19  | 28468556  | A  | G  | 1.15 (1.09, 1.21)     | 3.66E-07 | 1.12 (1.06, 1.18)   | 2.41E-05 | 0.96 (0.83, 1.10)     | 5.32E-01 | No                | No          |            |         |
| rs433223   | 21  | 24423707  | A  | G  | 1.09 (1.05, 1.14)     | 5.45E-05 | 1.10 (1.05, 1.14)   | 2.42E-05 | 1.08 (0.97, 1.21)     | 1.43E-01 | No                | No          |            |         |
| rs4762904  | 12  | 22478425  | A  | G  | 1.10 (1.05, 1.14)     | 9.93E-06 | 1.09 (1.05, 1.14)   | 3.13E-05 | 1.04 (0.94, 1.16)     | 4.10E-01 | No                | No          | G,         | ST8SIA1 |
| rs7728254  | 5   | 6810950   | A  | G  | 1.08 (1.04, 1.13)     | 1.39E-04 | 1.09 (1.05, 1.14)   | 3.32E-05 | 1.01 (0.91, 1.12)     | 8.53E-01 | No                | No          |            |         |
