# Supplementary material for: Exhaustive Genome-Wide Search for SNP-SNP Interactions Across 10 Human Diseases
Source: PubMed Central journal article supplement (PMC4938657; doi:10.1534/g3.116.028563), 2016-05-12
Supplement: supp_g3.116.028563_TableS16.pdf [file supp_g3.116.028563_TableS16.pdf]

**Table S-16. All genome-wide significant marginal associations, type 2 diabetes.**

| RSID       | Chr | Position  | A1 | A0 | Discovery, unadjusted |          | Discovery, adjusted |          | Replication, adjusted |          | Genome-wide sig.? | Replicated? | Annotation | Gene    |
|------------|-----|-----------|----|----|-----------------------|----------|---------------------|----------|-----------------------|----------|-------------------|-------------|------------|---------|
|            |     |           |    |    | OR (95% CI)           | P        | OR (95% CI)         | P        | OR (95% CI)           | P        |                   |             |            |         |
| rs4506565  | 10  | 114756041 | T  | A  | 1.35 (1.29, 1.41)     | 1.55E-37 | 1.35 (1.28, 1.41)   | 3.22E-36 | 1.31 (1.17, 1.46)     | 1.92E-06 | Yes               | Yes         | D, G,      | TCF7L2  |
| rs4132670  | 10  | 114767771 | A  | G  | 1.34 (1.28, 1.40)     | 1.96E-36 | 1.34 (1.28, 1.40)   | 7.71E-35 | 1.32 (1.18, 1.47)     | 1.40E-06 | Yes               | Yes         | D, G,      | TCF7L2  |
| rs55899248 | 10  | 114773608 | G  | A  | 1.34 (1.28, 1.41)     | 2.08E-31 | 1.35 (1.28, 1.42)   | 3.82E-31 | 1.26 (1.09, 1.39)     | 8.38E-04 | Yes               | Yes         | D, G,      | TCF7L2  |
| rs12255372 | 10  | 114808902 | T  | G  | 1.30 (1.24, 1.36)     | 2.03E-28 | 1.30 (1.24, 1.36)   | 9.24E-27 | 1.32 (1.16, 1.46)     | 4.03E-06 | Yes               | Yes         | D, G,      | TCF7L2  |
| rs61872786 | 10  | 114806697 | A  | G  | 1.30 (1.23, 1.36)     | 1.61E-23 | 1.30 (1.23, 1.37)   | 5.54E-23 | 1.26 (1.10, 1.40)     | 6.74E-04 | Yes               | Yes         | D, G,      | TCF7L2  |
| rs7899529  | 10  | 114779538 | A  | G  | 1.20 (1.15, 1.25)     | 2.21E-16 | 1.20 (1.15, 1.25)   | 8.41E-16 | 1.17 (1.05, 1.30)     | 3.35E-03 | Yes               | Yes         | D, G,      | TCF7L2  |
| rs11196191 | 10  | 114780633 | C  | A  | 1.20 (1.15, 1.25)     | 5.29E-16 | 1.20 (1.15, 1.25)   | 1.34E-15 | 1.16 (1.04, 1.28)     | 6.46E-03 | Yes               | Yes         | D, G,      | TCF7L2  |
| rs61872790 | 10  | 114821527 | G  | A  | 1.23 (1.16, 1.30)     | 1.33E-12 | 1.24 (1.17, 1.31)   | 6.84E-13 | 1.25 (1.08, 1.43)     | 2.32E-03 | Yes               | Yes         | D, G,      | TCF7L2  |
| rs12255678 | 10  | 114729482 | G  | T  | 1.17 (1.11, 1.23)     | 4.18E-10 | 1.17 (1.11, 1.23)   | 1.42E-09 | 1.07 (0.92, 1.18)     | 4.95E-01 | Yes               | No          | R, D, G,   | TCF7L2  |
| rs2391591  | 7   | 28157664  | G  | T  | 1.14 (1.09, 1.19)     | 1.36E-08 | 1.14 (1.09, 1.20)   | 7.46E-09 | 1.00 (0.89, 1.10)     | 8.10E-01 | Yes               | No          | D, G,      | JAZF1   |
| rs6962289  | 7   | 28161379  | C  | A  | 1.14 (1.09, 1.19)     | 1.13E-08 | 1.14 (1.09, 1.20)   | 7.48E-09 | 1.00 (0.89, 1.10)     | 8.21E-01 | Yes               | No          | D, G,      | JAZF1   |
| rs13266634 | 8   | 118184783 | T  | C  | 0.87 (0.83, 0.91)     | 2.46E-08 | 0.87 (0.83, 0.91)   | 2.92E-08 | 0.95 (0.85, 1.07)     | 3.79E-01 | Yes               | No          | EX, D, G,  | SLC30A8 |
| rs849142   | 7   | 28185891  | T  | C  | 1.13 (1.08, 1.18)     | 7.03E-08 | 1.13 (1.08, 1.18)   | 3.18E-08 | 1.09 (0.98, 1.21)     | 9.91E-02 | Yes               | No          | D, G,      | JAZF1   |
| rs864745   | 7   | 28180556  | T  | C  | 1.13 (1.08, 1.18)     | 9.04E-08 | 1.13 (1.08, 1.18)   | 4.27E-08 | 1.10 (0.98, 1.21)     | 1.01E-01 | Yes               | No          | D, G,      | JAZF1   |
| rs1635852  | 7   | 28189411  | T  | C  | 1.13 (1.08, 1.18)     | 9.51E-08 | 1.13 (1.08, 1.18)   | 4.62E-08 | 1.09 (0.99, 1.21)     | 9.33E-02 | Yes               | No          | R, D, G,   | JAZF1   |
| rs849135   | 7   | 28196413  | A  | G  | 0.89 (0.85, 0.93)     | 1.19E-07 | 0.88 (0.85, 0.92)   | 5.39E-08 | 0.90 (0.81, 1.00)     | 5.48E-02 | Yes               | No          | D, G,      | JAZF1   |
| rs1708302  | 7   | 28198677  | T  | C  | 0.89 (0.85, 0.93)     | 1.32E-07 | 0.88 (0.85, 0.92)   | 6.01E-08 | 0.90 (0.81, 1.00)     | 5.38E-02 | Yes               | No          | D, G,      | JAZF1   |
| rs6801848  | 3   | 185499057 | G  | C  | 1.13 (1.08, 1.18)     | 5.17E-07 | 1.14 (1.09, 1.20)   | 9.58E-08 | 1.10 (0.98, 1.24)     | 8.99E-02 | Yes               | No          | D, G,      | IGF2BP2 |
