# Supplementary material for: Exhaustive Genome-Wide Search for SNP-SNP Interactions Across 10 Human Diseases
Source: PubMed Central journal article supplement (PMC4938657; doi:10.1534/g3.116.028563), 2016-05-12
Supplement: supp_g3.116.028563_TableS17.pdf [file supp_g3.116.028563_TableS17.pdf]

**Table S-17. All genome-wide significant marginal associations, dyslipidaemia.**

| RSID       | Chr | Position  | A1 | A0 | Discovery, unadjusted |          | Discovery, adjusted |          | Replication, adjusted |          | Genome-wide sig.? | Replicated? | Annotation | Gene |
|------------|-----|-----------|----|----|-----------------------|----------|---------------------|----------|-----------------------|----------|-------------------|-------------|------------|------|
|            |     |           |    |    | OR (95% CI)           | P        | OR (95% CI)         | P        | OR (95% CI)           | P        |                   |             |            |      |
| rs1367117  | 2   | 21263900  | A  | G  | 1.19 (1.16, 1.23)     | 4.18E-30 | 1.24 (1.20, 1.28)   | 1.83E-37 | 1.06 (0.94, 1.19)     | 3.41E-01 | Yes               | No          | EX, D, G,  | APOB |
| rs1469513  | 2   | 21259562  | C  | T  | 1.17 (1.14, 1.20)     | 6.95E-27 | 1.20 (1.16, 1.23)   | 9.38E-31 | 1.09 (0.98, 1.22)     | 9.59E-02 | Yes               | No          | D, G,      | APOB |
| rs7575840  | 2   | 21273490  | T  | G  | 1.17 (1.14, 1.21)     | 2.92E-25 | 1.21 (1.17, 1.25)   | 9.65E-31 | 1.08 (0.97, 1.22)     | 1.40E-01 | Yes               | No          |            |      |
| rs10199768 | 2   | 21244000  | T  | G  | 1.16 (1.13, 1.19)     | 3.36E-24 | 1.19 (1.15, 1.22)   | 1.10E-28 | 1.10 (0.99, 1.23)     | 6.47E-02 | Yes               | No          | D, G,      | APOB |
| rs17395512 | 2   | 21346556  | C  | T  | 1.16 (1.12, 1.19)     | 1.28E-20 | 1.19 (1.15, 1.23)   | 4.07E-26 | 1.06 (0.96, 1.20)     | 2.33E-01 | Yes               | No          |            |      |
| rs9305020  | 19  | 11186711  | C  | T  | 0.83 (0.80, 0.86)     | 2.39E-24 | 0.81 (0.78, 0.84)   | 5.34E-26 | 0.83 (0.70, 0.92)     | 2.28E-03 | Yes               | Yes         |            |      |
| rs952275   | 2   | 21221399  | G  | T  | 1.14 (1.11, 1.17)     | 7.76E-20 | 1.17 (1.14, 1.21)   | 2.31E-25 | 1.16 (1.06, 1.31)     | 3.17E-03 | Yes               | Yes         | D, G,      | APOB |
| rs693      | 2   | 21232195  | A  | G  | 1.14 (1.11, 1.17)     | 4.02E-20 | 1.17 (1.14, 1.21)   | 2.32E-25 | 1.16 (1.06, 1.31)     | 3.26E-03 | Yes               | Yes         | D, G,      | APOB |
| rs1041968  | 2   | 21232804  | A  | G  | 1.14 (1.11, 1.17)     | 2.17E-19 | 1.17 (1.14, 1.21)   | 1.17E-24 | 1.19 (1.07, 1.33)     | 1.28E-03 | Yes               | Yes         | D, G,      | APOB |
| rs562338   | 2   | 21288321  | A  | G  | 0.85 (0.82, 0.88)     | 3.49E-18 | 0.82 (0.79, 0.86)   | 3.27E-23 | 0.84 (0.72, 0.94)     | 5.22E-03 | Yes               | Yes         |            |      |
| rs515135   | 2   | 21286057  | T  | C  | 0.86 (0.83, 0.89)     | 1.76E-17 | 0.83 (0.80, 0.86)   | 1.00E-22 | 0.83 (0.71, 0.94)     | 3.65E-03 | Yes               | Yes         |            |      |
| rs541041   | 2   | 21294975  | G  | A  | 0.86 (0.83, 0.89)     | 1.53E-17 | 0.83 (0.80, 0.86)   | 5.24E-22 | 0.83 (0.72, 0.95)     | 5.93E-03 | Yes               | Yes         |            |      |
| rs13392272 | 2   | 21217490  | T  | C  | 1.13 (1.10, 1.16)     | 3.07E-17 | 1.16 (1.12, 1.19)   | 3.31E-21 | 1.16 (1.04, 1.29)     | 5.75E-03 | Yes               | Yes         |            |      |
| rs481069   | 2   | 21281856  | G  | A  | 0.86 (0.83, 0.89)     | 7.62E-15 | 0.82 (0.79, 0.86)   | 3.89E-20 | 0.82 (0.69, 0.93)     | 3.70E-03 | Yes               | Yes         |            |      |
| rs62122481 | 2   | 21216815  | A  | C  | 1.12 (1.09, 1.16)     | 7.66E-15 | 1.16 (1.12, 1.19)   | 1.07E-19 | 1.14 (1.02, 1.28)     | 2.08E-02 | Yes               | Yes         |            |      |
| rs10808546 | 8   | 126495818 | T  | C  | 0.88 (0.86, 0.91)     | 9.49E-19 | 0.87 (0.84, 0.90)   | 1.28E-19 | 0.90 (0.80, 1.00)     | 4.33E-02 | Yes               | Yes         |            |      |
| rs12477249 | 2   | 21400661  | A  | G  | 1.12 (1.09, 1.16)     | 1.64E-14 | 1.16 (1.12, 1.19)   | 2.08E-19 | 1.03 (0.91, 1.15)     | 6.75E-01 | Yes               | No          |            |      |
| rs7567217  | 2   | 21303470  | C  | T  | 0.86 (0.83, 0.90)     | 1.17E-13 | 0.83 (0.80, 0.86)   | 1.16E-18 | 0.81 (0.69, 0.93)     | 3.18E-03 | Yes               | Yes         |            |      |
| rs949790   | 2   | 21449987  | A  | G  | 1.13 (1.09, 1.17)     | 1.09E-12 | 1.17 (1.13, 1.22)   | 1.47E-18 | 1.07 (0.95, 1.22)     | 2.57E-01 | Yes               | No          |            |      |
| rs2980871  | 8   | 126488930 | G  | A  | 0.88 (0.86, 0.91)     | 8.66E-18 | 0.87 (0.85, 0.90)   | 2.04E-18 | 0.89 (0.80, 0.99)     | 3.78E-02 | Yes               | Yes         |            |      |
| rs2954031  | 8   | 126491733 | T  | G  | 0.89 (0.86, 0.91)     | 3.91E-17 | 0.87 (0.85, 0.90)   | 3.27E-18 | 0.89 (0.80, 0.99)     | 2.85E-02 | Yes               | Yes         |            |      |
| rs614303   | 2   | 21313577  | G  | A  | 0.88 (0.85, 0.91)     | 5.27E-14 | 0.85 (0.82, 0.88)   | 4.29E-18 | 0.84 (0.73, 0.95)     | 6.15E-03 | Yes               | Yes         |            |      |
| rs506585   | 2   | 21397182  | G  | A  | 0.87 (0.84, 0.90)     | 1.88E-14 | 0.85 (0.82, 0.88)   | 4.55E-18 | 0.83 (0.72, 0.94)     | 4.38E-03 | Yes               | Yes         |            |      |
| rs2001945  | 8   | 126477978 | G  | C  | 1.13 (1.10, 1.16)     | 2.28E-17 | 1.14 (1.11, 1.18)   | 4.61E-18 | NA (0.95, 1.18)       | 3.11E-01 | Yes               | No          |            |      |
| rs6982502  | 8   | 126479362 | C  | T  | 1.13 (1.10, 1.16)     | 3.47E-17 | 1.14 (1.11, 1.18)   | 4.75E-18 | 1.06 (0.95, 1.17)     | 3.21E-01 | Yes               | No          |            |      |
| rs478442   | 2   | 21399216  | G  | T  | 0.87 (0.84, 0.91)     | 3.27E-14 | 0.85 (0.82, 0.88)   | 8.17E-18 | 0.84 (0.73, 0.94)     | 4.89E-03 | Yes               | Yes         |            |      |
| rs544039   | 2   | 21398985  | C  | A  | 0.87 (0.84, 0.91)     | 3.26E-14 | 0.85 (0.82, 0.88)   | 8.95E-18 | NA (0.73, 0.95)       | 5.17E-03 | Yes               | Yes         | R,         |      |
| rs1712251  | 2   | 21396551  | G  | A  | 0.88 (0.85, 0.91)     | 5.19E-14 | 0.85 (0.82, 0.88)   | 9.11E-18 | 0.83 (0.72, 0.94)     | 4.35E-03 | Yes               | Yes         |            |      |
| rs560408   | 2   | 21398379  | T  | C  | 0.88 (0.85, 0.91)     | 3.87E-14 | 0.85 (0.82, 0.88)   | 9.68E-18 | NA (0.72, 0.94)       | 4.40E-03 | Yes               | Yes         |            |      |
| rs17321515 | 8   | 126486409 | G  | A  | 0.89 (0.86, 0.91)     | 3.31E-17 | 0.88 (0.85, 0.90)   | 1.16E-17 | 0.88 (0.80, 0.99)     | 3.34E-02 | Yes               | Yes         |            |      |
| rs574461   | 2   | 21400013  | A  | G  | 0.88 (0.85, 0.91)     | 5.67E-14 | 0.85 (0.82, 0.88)   | 1.25E-17 | 0.84 (0.73, 0.94)     | 4.68E-03 | Yes               | Yes         |            |      |
| rs578095   | 2   | 21393866  | A  | G  | 0.87 (0.85, 0.91)     | 4.44E-14 | 0.85 (0.82, 0.88)   | 1.26E-17 | 0.84 (0.73, 0.95)     | 5.72E-03 | Yes               | Yes         |            |      |
| rs1652420  | 2   | 21383881  | A  | T  | 0.88 (0.85, 0.91)     | 8.29E-14 | 0.85 (0.82, 0.88)   | 1.32E-17 | 0.85 (0.74, 0.96)     | 9.96E-03 | Yes               | Yes         |            |      |
| rs531380   | 2   | 21397561  | C  | G  | 0.88 (0.85, 0.91)     | 6.27E-14 | 0.85 (0.82, 0.88)   | 1.35E-17 | NA (0.73, 0.95)       | 5.18E-03 | Yes               | Yes         |            |      |
| rs1712247  | 2   | 21383951  | C  | T  | 0.88 (0.85, 0.91)     | 5.65E-14 | 0.85 (0.82, 0.88)   | 1.45E-17 | 0.84 (0.73, 0.95)     | 7.06E-03 | Yes               | Yes         |            |      |
| rs522250   | 2   | 21387113  | T  | C  | 0.88 (0.84, 0.91)     | 6.52E-14 | 0.85 (0.82, 0.88)   | 1.45E-17 | 0.84 (0.73, 0.95)     | 6.23E-03 | Yes               | Yes         |            |      |
| rs1652416  | 2   | 21396609  | A  | G  | 0.88 (0.85, 0.91)     | 5.58E-14 | 0.85 (0.82, 0.88)   | 1.45E-17 | 0.83 (0.72, 0.94)     | 3.89E-03 | Yes               | Yes         |            |      |
| rs483436   | 2   | 21390407  | G  | A  | 0.88 (0.85, 0.91)     | 6.48E-14 | 0.85 (0.82, 0.88)   | 1.47E-17 | 0.84 (0.73, 0.95)     | 5.96E-03 | Yes               | Yes         |            |      |
| rs494465   | 2   | 21401010  | C  | T  | 0.88 (0.85, 0.91)     | 7.69E-14 | 0.85 (0.82, 0.88)   | 1.64E-17 | 0.84 (0.72, 0.94)     | 4.37E-03 | Yes               | Yes         |            |      |
| rs480787   | 2   | 21390169  | A  | G  | 0.88 (0.85, 0.91)     | 7.12E-14 | 0.85 (0.82, 0.88)   | 1.71E-17 | 0.84 (0.73, 0.95)     | 6.68E-03 | Yes               | Yes         |            |      |
| rs560844   | 2   | 21389108  | A  | G  | 0.88 (0.85, 0.91)     | 5.92E-14 | 0.85 (0.82, 0.88)   | 1.78E-17 | 0.84 (0.73, 0.95)     | 6.30E-03 | Yes               | Yes         |            |      |
| rs532225   | 2   | 21397637  | T  | C  | 0.88 (0.85, 0.91)     | 7.68E-14 | 0.85 (0.82, 0.88)   | 1.79E-17 | 0.84 (0.73, 0.95)     | 8.05E-03 | Yes               | Yes         |            |      |
| rs573314   | 2   | 21385161  | C  | G  | 0.88 (0.85, 0.91)     | 7.49E-14 | 0.85 (0.82, 0.88)   | 2.04E-17 | 0.84 (0.73, 0.95)     | 5.08E-03 | Yes               | Yes         |            |      |
| rs554414   | 2   | 21394892  | T  | C  | 0.88 (0.85, 0.91)     | 8.47E-14 | 0.85 (0.82, 0.88)   | 2.07E-17 | 0.84 (0.73, 0.95)     | 5.94E-03 | Yes               | Yes         |            |      |

**Table S-17. All genome-wide significant marginal associations, dyslipidaemia (continued).**

| RSID       | Chr | Position  | A1 | A0 | Discovery, unadjusted |          | Discovery, adjusted |          | Replication, adjusted |          | Genome-wide sig.? | Replicated? | Annotation | Gene   |
|------------|-----|-----------|----|----|-----------------------|----------|---------------------|----------|-----------------------|----------|-------------------|-------------|------------|--------|
|            |     |           |    |    | OR (95% CI)           | P        | OR (95% CI)         | P        | OR (95% CI)           | P        |                   |             |            |        |
| rs494315   | 2   | 21400950  | C  | T  | 0.88 (0.85, 0.91)     | 7.80E-14 | 0.85 (0.82, 0.88)   | 2.15E-17 | 0.83 (0.72, 0.94)     | 3.88E-03 | Yes               | Yes         |            |        |
| rs570033   | 2   | 21399567  | C  | G  | 0.88 (0.85, 0.91)     | 8.78E-14 | 0.85 (0.82, 0.88)   | 2.19E-17 | 0.83 (0.72, 0.94)     | 3.93E-03 | Yes               | Yes         |            |        |
| rs558342   | 2   | 21395469  | G  | A  | 0.88 (0.85, 0.91)     | 1.73E-13 | 0.85 (0.82, 0.89)   | 2.21E-17 | 0.84 (0.73, 0.95)     | 5.04E-03 | Yes               | Yes         |            |        |
| rs486246   | 2   | 21406751  | G  | A  | 0.88 (0.85, 0.91)     | 7.92E-14 | 0.85 (0.82, 0.88)   | 2.40E-17 | 0.84 (0.73, 0.95)     | 6.95E-03 | Yes               | Yes         |            |        |
| rs548506   | 2   | 21385541  | A  | G  | 0.88 (0.85, 0.91)     | 8.37E-14 | 0.85 (0.82, 0.88)   | 2.60E-17 | 0.84 (0.73, 0.95)     | 6.13E-03 | Yes               | Yes         |            |        |
| rs1652418  | 2   | 21388456  | T  | C  | 0.88 (0.85, 0.91)     | 9.40E-14 | 0.85 (0.82, 0.88)   | 2.75E-17 | 0.83 (0.72, 0.93)     | 2.77E-03 | Yes               | Yes         |            |        |
| rs538528   | 2   | 21391740  | T  | C  | 0.88 (0.85, 0.91)     | 9.83E-14 | 0.85 (0.82, 0.88)   | 2.83E-17 | 0.84 (0.72, 0.94)     | 4.02E-03 | Yes               | Yes         |            |        |
| rs3741298  | 11  | 116657561 | C  | T  | 1.16 (1.12, 1.20)     | 4.20E-17 | 1.17 (1.13, 1.22)   | 2.88E-17 | 1.04 (0.92, 1.19)     | 5.03E-01 | Yes               | No          | D, G,      | ZNF259 |
| rs4591370  | 2   | 21383742  | A  | G  | 0.88 (0.85, 0.91)     | 1.31E-13 | 0.85 (0.82, 0.88)   | 2.89E-17 | 0.85 (0.74, 0.96)     | 8.96E-03 | Yes               | Yes         |            |        |
| rs2954019  | 8   | 126477759 | A  | G  | 0.89 (0.86, 0.91)     | 2.91E-16 | 0.88 (0.85, 0.91)   | 3.15E-17 | 0.90 (0.81, 1.00)     | 5.59E-02 | Yes               | No          |            |        |
| rs2980856  | 8   | 126476379 | G  | C  | 0.89 (0.86, 0.91)     | 1.81E-16 | 0.88 (0.85, 0.91)   | 3.16E-17 | NA (0.81, 1.01)       | 7.56E-02 | Yes               | No          | R,         |        |
| rs501863   | 2   | 21390000  | G  | A  | 0.88 (0.85, 0.91)     | 1.06E-13 | 0.85 (0.82, 0.89)   | 3.20E-17 | 0.84 (0.73, 0.95)     | 6.56E-03 | Yes               | Yes         |            |        |
| rs529697   | 2   | 21387948  | G  | T  | 0.88 (0.85, 0.91)     | 1.56E-13 | 0.85 (0.82, 0.89)   | 3.40E-17 | 0.84 (0.72, 0.94)     | 4.52E-03 | Yes               | Yes         |            |        |
| rs540439   | 2   | 21391978  | C  | T  | 0.88 (0.85, 0.91)     | 1.43E-13 | 0.85 (0.82, 0.89)   | 3.58E-17 | 0.84 (0.73, 0.95)     | 5.82E-03 | Yes               | Yes         |            |        |
| rs6982636  | 8   | 126479315 | A  | G  | 0.89 (0.86, 0.91)     | 2.27E-16 | 0.88 (0.85, 0.91)   | 3.90E-17 | 0.89 (0.81, 1.00)     | 5.74E-02 | Yes               | No          | R,         |        |
| rs568938   | 2   | 21303616  | C  | T  | 0.88 (0.85, 0.91)     | 1.51E-13 | 0.85 (0.82, 0.89)   | 4.15E-17 | 0.83 (0.73, 0.95)     | 5.52E-03 | Yes               | Yes         |            |        |
| rs541569   | 2   | 21398768  | G  | A  | 0.88 (0.85, 0.91)     | 1.70E-13 | 0.85 (0.82, 0.89)   | 4.35E-17 | 0.84 (0.72, 0.94)     | 4.39E-03 | Yes               | Yes         |            |        |
| rs561850   | 2   | 21395805  | A  | G  | 0.88 (0.85, 0.91)     | 1.32E-13 | 0.85 (0.82, 0.89)   | 4.39E-17 | 0.84 (0.73, 0.94)     | 5.04E-03 | Yes               | Yes         |            |        |
| rs2980855  | 8   | 126477476 | C  | T  | 0.89 (0.86, 0.91)     | 2.67E-16 | 0.88 (0.85, 0.91)   | 4.40E-17 | 0.91 (0.82, 1.02)     | 9.64E-02 | Yes               | No          |            |        |
| rs5002500  | 2   | 21399974  | C  | G  | 0.88 (0.85, 0.91)     | 1.32E-13 | 0.85 (0.82, 0.88)   | 4.51E-17 | 0.84 (0.73, 0.96)     | 8.43E-03 | Yes               | Yes         |            |        |
| rs4560142  | 2   | 21383717  | C  | T  | 0.88 (0.85, 0.91)     | 1.24E-13 | 0.85 (0.82, 0.89)   | 4.97E-17 | 0.83 (0.72, 0.94)     | 3.62E-03 | Yes               | Yes         |            |        |
| rs312970   | 2   | 21369815  | A  | T  | 0.88 (0.85, 0.91)     | 2.50E-13 | 0.85 (0.82, 0.89)   | 5.83E-17 | NA (0.73, 0.95)       | 6.14E-03 | Yes               | Yes         |            |        |
| rs480732   | 2   | 21390149  | A  | T  | 0.88 (0.85, 0.91)     | 2.60E-13 | 0.85 (0.82, 0.89)   | 7.31E-17 | NA (0.73, 0.95)       | 5.25E-03 | Yes               | Yes         |            |        |
| rs312985   | 2   | 21378805  | A  | G  | 0.88 (0.85, 0.91)     | 3.88E-13 | 0.86 (0.82, 0.89)   | 9.09E-17 | NA (0.73, 0.95)       | 5.65E-03 | Yes               | Yes         |            |        |
| rs477146   | 2   | 21396334  | A  | G  | 0.88 (0.85, 0.91)     | 3.15E-13 | 0.85 (0.82, 0.89)   | 9.98E-17 | 0.84 (0.73, 0.95)     | 8.18E-03 | Yes               | Yes         |            |        |
| rs527034   | 2   | 21382786  | C  | A  | 0.88 (0.85, 0.91)     | 9.13E-13 | 0.85 (0.82, 0.89)   | 1.08E-16 | 0.85 (0.73, 0.96)     | 8.62E-03 | Yes               | Yes         |            |        |
| rs2001844  | 8   | 126478745 | G  | A  | 0.89 (0.87, 0.92)     | 1.12E-15 | 0.88 (0.86, 0.91)   | 1.37E-16 | 0.89 (0.81, 1.00)     | 5.45E-02 | Yes               | No          | R,         |        |
| rs58443763 | 8   | 126480526 | T  | C  | 0.89 (0.87, 0.92)     | 1.06E-15 | 0.88 (0.86, 0.91)   | 1.79E-16 | 0.90 (0.81, 1.01)     | 6.29E-02 | Yes               | No          |            |        |
| rs2954022  | 8   | 126482621 | A  | C  | 0.89 (0.87, 0.92)     | 1.08E-15 | 0.88 (0.86, 0.91)   | 1.80E-16 | 0.90 (0.81, 1.01)     | 6.78E-02 | Yes               | No          |            |        |
| rs2980875  | 8   | 126481747 | G  | A  | 0.89 (0.87, 0.92)     | 1.56E-15 | 0.88 (0.86, 0.91)   | 2.84E-16 | 0.90 (0.81, 1.00)     | 5.98E-02 | Yes               | No          |            |        |
| rs576203   | 2   | 21393623  | A  | G  | 0.88 (0.85, 0.91)     | 3.68E-12 | 0.86 (0.83, 0.89)   | 1.76E-15 | 0.85 (0.74, 0.97)     | 1.57E-02 | Yes               | Yes         |            |        |
| rs7605304  | 2   | 21445569  | A  | G  | 1.13 (1.09, 1.17)     | 5.47E-11 | 1.17 (1.13, 1.22)   | 2.64E-15 | 1.10 (0.96, 1.27)     | 1.67E-01 | Yes               | No          |            |        |
| rs2927472  | 19  | 45349369  | T  | C  | 0.88 (0.85, 0.91)     | 9.93E-11 | 0.85 (0.81, 0.88)   | 6.68E-15 | 0.71 (0.59, 0.81)     | 5.45E-06 | Yes               | Yes         | R, G,      | PVRL2  |
| rs3846662  | 5   | 74651084  | G  | A  | 1.11 (1.08, 1.14)     | 2.09E-12 | 1.12 (1.08, 1.15)   | 5.50E-13 | 1.12 (1.01, 1.25)     | 2.76E-02 | Yes               | Yes         | D, G,      | HMGCR  |
| rs520354   | 2   | 21259612  | G  | A  | 0.90 (0.87, 0.93)     | 2.76E-13 | 0.90 (0.87, 0.92)   | 8.32E-13 | 1.00 (0.89, 1.10)     | 8.84E-01 | Yes               | No          | D, G,      | APOB   |
| rs365946   | 2   | 21439329  | T  | G  | 0.89 (0.86, 0.93)     | 1.04E-09 | 0.87 (0.84, 0.90)   | 1.14E-12 | 0.81 (0.71, 0.95)     | 6.10E-03 | Yes               | Yes         |            |        |
| rs7846466  | 8   | 126485531 | T  | C  | 1.12 (1.09, 1.16)     | 1.27E-13 | 1.12 (1.09, 1.16)   | 3.37E-12 | 1.04 (0.94, 1.19)     | 3.65E-01 | Yes               | No          |            |        |
| rs12916    | 5   | 74656539  | C  | T  | 1.10 (1.07, 1.14)     | 1.98E-11 | 1.11 (1.08, 1.15)   | 3.74E-12 | 1.15 (1.04, 1.30)     | 6.06E-03 | Yes               | Yes         | D, G,      | HMGCR  |
| rs97458    | 2   | 21327635  | G  | A  | 0.91 (0.89, 0.94)     | 4.67E-09 | 0.89 (0.86, 0.92)   | 6.04E-12 | 0.85 (0.74, 0.92)     | 9.59E-04 | Yes               | Yes         |            |        |
| rs7187     | 19  | 11275258  | G  | A  | 1.10 (1.07, 1.13)     | 9.17E-10 | 1.12 (1.08, 1.15)   | 9.60E-12 | 1.00 (0.92, 1.15)     | 6.79E-01 | Yes               | No          | G,         | KANK2  |
| rs395908   | 19  | 45373565  | A  | G  | 0.89 (0.86, 0.93)     | 4.74E-09 | 0.87 (0.83, 0.90)   | 1.16E-11 | 0.82 (0.68, 0.92)     | 2.30E-03 | Yes               | Yes         | G,         | PVRL2  |
| rs2954025  | 8   | 126484463 | C  | T  | 1.11 (1.08, 1.14)     | 1.28E-12 | 1.11 (1.08, 1.15)   | 2.32E-11 | 1.10 (1.00, 1.25)     | 5.26E-02 | Yes               | No          |            |        |
| rs4336630  | 8   | 126484276 | T  | G  | 1.11 (1.08, 1.14)     | 1.57E-12 | 1.11 (1.08, 1.15)   | 3.61E-11 | 1.10 (0.99, 1.25)     | 6.19E-02 | Yes               | No          |            |        |
| rs6859     | 19  | 45382034  | A  | G  | 1.09 (1.06, 1.12)     | 1.57E-08 | 1.11 (1.07, 1.14)   | 1.38E-10 | 1.05 (0.97, 1.20)     | 1.70E-01 | Yes               | No          | G,         | PVRL2  |

**Table S-17. All genome-wide significant marginal associations, dyslipidaemia (continued).**

| RSID       | Chr | Position  | A1 | A0 | Discovery, unadjusted |          | Discovery, adjusted |          | Replication, adjusted |          | Genome-wide sig.? | Replicated? | Annotation | Gene     |
|------------|-----|-----------|----|----|-----------------------|----------|---------------------|----------|-----------------------|----------|-------------------|-------------|------------|----------|
|            |     |           |    |    | OR (95% CI)           | P        | OR (95% CI)         | P        | OR (95% CI)           | P        |                   |             |            |          |
| rs11096689 | 2   | 21140540  | C  | T  | 1.09 (1.06, 1.13)     | 9.79E-08 | 1.12 (1.08, 1.15)   | 1.89E-10 | 1.10 (0.99, 1.26)     | 7.09E-02 | Yes               | No          |            |          |
| rs780093   | 2   | 27742603  | T  | C  | 1.10 (1.07, 1.13)     | 1.81E-10 | 1.10 (1.07, 1.14)   | 2.14E-10 | 1.00 (0.88, 1.09)     | 7.40E-01 | Yes               | No          | D, G,      | GCKR     |
| rs11685356 | 2   | 21197159  | T  | C  | 1.10 (1.07, 1.14)     | 3.86E-09 | 1.12 (1.08, 1.16)   | 2.34E-10 | 1.13 (1.00, 1.27)     | 5.63E-02 | Yes               | No          |            |          |
| rs651007   | 9   | 136153875 | T  | C  | 1.12 (1.08, 1.15)     | 6.52E-10 | 1.13 (1.08, 1.17)   | 2.46E-10 | 1.10 (0.98, 1.27)     | 8.83E-02 | Yes               | No          | G,         | ABO      |
| rs12654264 | 5   | 74648603  | T  | A  | 1.09 (1.06, 1.12)     | 4.07E-09 | 1.10 (1.07, 1.14)   | 3.01E-10 | 1.15 (1.04, 1.29)     | 9.05E-03 | Yes               | Yes         | D, G,      | HMGCR    |
| rs35239705 | 2   | 21451687  | A  | G  | 0.91 (0.88, 0.94)     | 8.41E-08 | 0.89 (0.86, 0.92)   | 4.05E-10 | 0.89 (0.78, 1.02)     | 1.02E-01 | Yes               | No          |            |          |
| rs11749783 | 5   | 74626082  | C  | T  | 1.09 (1.06, 1.12)     | 3.21E-09 | 1.10 (1.07, 1.14)   | 4.28E-10 | 1.13 (1.02, 1.26)     | 2.38E-02 | Yes               | Yes         |            |          |
| rs780094   | 2   | 27741237  | T  | C  | 1.10 (1.07, 1.13)     | 2.05E-10 | 1.10 (1.07, 1.14)   | 4.36E-10 | 1.00 (0.89, 1.11)     | 8.72E-01 | Yes               | No          | R, D, G,   | GCKR     |
| rs7703051  | 5   | 74625487  | A  | C  | 1.09 (1.06, 1.12)     | 5.59E-09 | 1.10 (1.07, 1.14)   | 7.20E-10 | 1.13 (1.02, 1.27)     | 2.28E-02 | Yes               | Yes         |            |          |
| rs5744680  | 5   | 74879890  | A  | G  | 1.09 (1.06, 1.12)     | 3.00E-09 | 1.10 (1.07, 1.13)   | 8.02E-10 | 1.09 (0.97, 1.21)     | 1.37E-01 | Yes               | No          | G,         | POLK     |
| rs10207315 | 2   | 21196346  | T  | G  | 1.10 (1.06, 1.13)     | 3.43E-08 | 1.11 (1.08, 1.15)   | 1.02E-09 | 1.14 (1.00, 1.28)     | 5.03E-02 | Yes               | No          |            |          |
| rs3846663  | 5   | 74655726  | T  | C  | 1.09 (1.06, 1.12)     | 7.58E-09 | 1.10 (1.07, 1.13)   | 1.05E-09 | 1.14 (1.04, 1.29)     | 9.72E-03 | Yes               | Yes         | D, G,      | HMGCR    |
| rs4704220  | 5   | 74757556  | A  | G  | 1.09 (1.06, 1.12)     | 4.45E-09 | 1.10 (1.07, 1.13)   | 1.24E-09 | 1.09 (0.97, 1.21)     | 1.35E-01 | Yes               | No          | G,         | COL4A3BP |
| rs4704223  | 5   | 74773420  | C  | T  | 1.09 (1.06, 1.12)     | 3.65E-09 | 1.10 (1.07, 1.13)   | 1.33E-09 | 1.10 (0.98, 1.22)     | 1.03E-01 | Yes               | No          | G,         | COL4A3BP |
| rs4704219  | 5   | 74748505  | T  | C  | 1.09 (1.06, 1.12)     | 4.98E-09 | 1.10 (1.07, 1.13)   | 1.41E-09 | NA (0.97, 1.20)       | 1.74E-01 | Yes               | No          | G,         | COL4A3BP |
| rs3764261  | 16  | 56993324  | A  | C  | 0.91 (0.88, 0.94)     | 1.56E-09 | 0.91 (0.88, 0.94)   | 1.42E-09 | 1.05 (0.92, 1.16)     | 5.66E-01 | Yes               | No          | D, G,      | CETP     |
| rs2335418  | 5   | 74603479  | A  | G  | 1.09 (1.06, 1.12)     | 2.72E-09 | 1.10 (1.06, 1.13)   | 1.44E-09 | 1.10 (0.99, 1.23)     | 6.39E-02 | Yes               | No          |            |          |
| rs4549504  | 5   | 74808237  | T  | G  | 1.09 (1.06, 1.12)     | 7.16E-09 | 1.10 (1.07, 1.13)   | 1.50E-09 | NA (0.98, 1.22)       | 9.91E-02 | Yes               | No          | G,         | POLK     |
| rs473770   | 2   | 21403965  | G  | A  | 0.91 (0.88, 0.94)     | 2.59E-08 | 0.90 (0.87, 0.93)   | 1.83E-09 | 0.85 (0.74, 0.95)     | 4.66E-03 | Yes               | Yes         |            |          |
| rs12149545 | 16  | 56993161  | A  | G  | 0.91 (0.88, 0.94)     | 2.30E-09 | 0.91 (0.88, 0.94)   | 1.95E-09 | 1.04 (0.92, 1.16)     | 6.30E-01 | Yes               | No          | D, G,      | CETP     |
| rs11748027 | 5   | 74909972  | T  | C  | 1.09 (1.06, 1.12)     | 6.80E-09 | 1.10 (1.06, 1.13)   | 2.17E-09 | 1.09 (0.97, 1.21)     | 1.45E-01 | Yes               | No          | G,         | ANKDD1B  |
| rs4704221  | 5   | 74759183  | A  | T  | 1.09 (1.06, 1.12)     | 1.14E-08 | 1.10 (1.06, 1.13)   | 2.25E-09 | 1.10 (0.99, 1.22)     | 9.10E-02 | Yes               | No          | G,         | COL4A3BP |
| rs6544713  | 2   | 44073881  | T  | C  | 1.09 (1.06, 1.12)     | 1.46E-08 | 1.10 (1.07, 1.14)   | 2.58E-09 | 1.02 (0.91, 1.14)     | 7.19E-01 | Yes               | No          | D, G,      | ABCG8    |
| rs1551894  | 5   | 74570531  | A  | G  | 1.11 (1.07, 1.15)     | 3.04E-09 | 1.12 (1.08, 1.16)   | 2.71E-09 | 1.10 (0.96, 1.24)     | 1.76E-01 | Yes               | No          | R,         |          |
| rs6878990  | 5   | 74689249  | C  | T  | 1.09 (1.06, 1.12)     | 1.02E-08 | 1.10 (1.06, 1.13)   | 2.71E-09 | 1.09 (0.97, 1.21)     | 1.36E-01 | Yes               | No          | G,         | COL4A3BP |
| rs11957260 | 5   | 74608732  | T  | C  | 1.09 (1.06, 1.12)     | 6.01E-09 | 1.10 (1.06, 1.13)   | 2.95E-09 | 1.10 (0.99, 1.23)     | 7.19E-02 | Yes               | No          |            |          |
| rs17671591 | 5   | 74615021  | T  | C  | 1.10 (1.06, 1.13)     | 1.49E-09 | 1.10 (1.07, 1.13)   | 3.28E-09 | 1.17 (1.05, 1.31)     | 4.71E-03 | Yes               | Yes         | R,         |          |
| rs4604177  | 5   | 74808880  | T  | C  | 1.09 (1.06, 1.12)     | 1.74E-08 | 1.10 (1.06, 1.13)   | 4.20E-09 | 1.09 (0.98, 1.21)     | 1.16E-01 | Yes               | No          | R, G,      | POLK     |
| rs2000999  | 16  | 72108093  | A  | G  | 1.12 (1.08, 1.16)     | 4.15E-10 | 1.12 (1.08, 1.16)   | 6.86E-09 | NA (1.01, 1.32)       | 3.45E-02 | Yes               | Yes         | G,         | HPR      |
| rs3828793  | 6   | 32635883  | T  | C  | 1.11 (1.07, 1.15)     | 7.89E-08 | 1.13 (1.08, 1.17)   | 7.23E-09 | 1.10 (0.95, 1.27)     | 2.21E-01 | Yes               | No          | R, G,      | HLA-DQB1 |
| rs1728918  | 2   | 27635463  | A  | G  | 1.09 (1.06, 1.13)     | 2.32E-08 | 1.10 (1.07, 1.14)   | 9.42E-09 | 0.99 (0.86, 1.09)     | 5.78E-01 | Yes               | No          | G,         | PPM1G    |
| rs76186695 | 19  | 10908623  | T  | G  | 0.92 (0.88, 0.95)     | 1.54E-06 | 0.89 (0.86, 0.93)   | 1.23E-08 | 0.97 (0.80, 1.05)     | 1.96E-01 | Yes               | No          | R, G,      | DNM2     |
| rs4704200  | 5   | 74569856  | T  | G  | 1.09 (1.06, 1.12)     | 1.10E-08 | 1.09 (1.06, 1.12)   | 1.64E-08 | 1.06 (0.97, 1.20)     | 1.67E-01 | Yes               | No          |            |          |
| rs2304087  | 19  | 11107133  | C  | T  | 0.93 (0.90, 0.96)     | 6.53E-07 | 0.91 (0.89, 0.94)   | 1.69E-08 | 0.90 (0.77, 0.97)     | 1.10E-02 | Yes               | Yes         | G,         | SMARCA4  |
| rs7254776  | 19  | 45227742  | C  | T  | 0.93 (0.91, 0.96)     | 2.93E-06 | 0.91 (0.89, 0.94)   | 1.73E-08 | 0.94 (0.83, 1.04)     | 2.12E-01 | Yes               | No          |            |          |
| rs2980885  | 8   | 126474306 | G  | A  | 1.11 (1.07, 1.14)     | 2.91E-09 | 1.11 (1.07, 1.15)   | 1.80E-08 | 1.07 (0.95, 1.22)     | 2.51E-01 | Yes               | No          |            |          |
| rs1794275  | 6   | 32671248  | A  | G  | 1.11 (1.07, 1.15)     | 4.06E-08 | 1.12 (1.08, 1.17)   | 1.96E-08 | 1.08 (0.94, 1.25)     | 2.71E-01 | Yes               | No          |            |          |
| rs1423527  | 5   | 74602699  | A  | C  | 1.08 (1.05, 1.11)     | 6.41E-08 | 1.09 (1.06, 1.12)   | 2.28E-08 | 1.12 (1.01, 1.26)     | 2.66E-02 | Yes               | Yes         |            |          |
| rs28396311 | 6   | 32628190  | C  | T  | 1.10 (1.06, 1.15)     | 2.55E-07 | 1.12 (1.08, 1.17)   | 2.54E-08 | 1.08 (0.95, 1.26)     | 2.29E-01 | Yes               | No          | G,         | HLA-DQB1 |
| rs6871667  | 5   | 74604742  | A  | G  | 1.08 (1.05, 1.11)     | 1.73E-07 | 1.09 (1.06, 1.12)   | 3.55E-08 | 1.14 (1.01, 1.25)     | 3.57E-02 | Yes               | Yes         |            |          |
| rs588245   | 2   | 21270057  | A  | G  | 1.08 (1.05, 1.11)     | 1.99E-07 | 1.09 (1.06, 1.12)   | 3.98E-08 | 0.95 (0.85, 1.05)     | 2.65E-01 | Yes               | No          | D, G,      | APOB     |
| rs7730344  | 5   | 74587940  | A  | C  | 1.09 (1.05, 1.12)     | 1.31E-07 | 1.10 (1.06, 1.13)   | 4.45E-08 | 1.00 (0.89, 1.12)     | 9.57E-01 | Yes               | No          |            |          |
| rs13207836 | 6   | 32596374  | G  | A  | 1.10 (1.06, 1.15)     | 7.71E-07 | 1.12 (1.07, 1.17)   | 6.08E-08 | 1.06 (0.94, 1.26)     | 2.73E-01 | Yes               | No          |            |          |
| rs34947241 | 6   | 32592239  | C  | T  | 1.11 (1.06, 1.15)     | 4.60E-07 | 1.12 (1.07, 1.17)   | 7.68E-08 | 1.07 (0.95, 1.27)     | 2.18E-01 | Yes               | No          |            |          |

**Table S-17. All genome-wide significant marginal associations, dyslipidaemia (continued).**

| RSID       | Chr | Position | A1 | A0 | Discovery, unadjusted |          | Discovery, adjusted |          | Replication, adjusted |          | Genome-wide sig.? | Replicated? | Annotation | Gene  |
|------------|-----|----------|----|----|-----------------------|----------|---------------------|----------|-----------------------|----------|-------------------|-------------|------------|-------|
|            |     |          |    |    | OR (95% CI)           | P        | OR (95% CI)         | P        | OR (95% CI)           | P        |                   |             |            |       |
| rs4248166  | 6   | 32366421 | C  | T  | 1.09 (1.05, 1.14)     | 4.70E-06 | 1.12 (1.07, 1.16)   | 8.57E-08 | 0.97 (0.83, 1.12)     | 6.32E-01 | Yes               | No          | R, G,      | BTNL2 |
| rs35014460 | 6   | 32591106 | C  | T  | 1.10 (1.06, 1.14)     | 1.05E-06 | 1.12 (1.07, 1.16)   | 8.63E-08 | 1.04 (0.92, 1.24)     | 3.78E-01 | Yes               | No          |            |       |
