# Supplementary material for: Exhaustive Genome-Wide Search for SNP-SNP Interactions Across 10 Human Diseases
Source: PubMed Central journal article supplement (PMC4938657; doi:10.1534/g3.116.028563), 2016-05-12
Supplement: supp_g3.116.028563_TableS18.pdf [file supp_g3.116.028563_TableS18.pdf]

**Table S-18. Top 10 most significant marginal associations, hemorrhoids.**

| RSID      | Chr | Position  | A1 | A0 | Discovery, unadjusted |          | Discovery, adjusted |          | Replication, adjusted |          | Genome-wide sig.? | Replicated? | Annotation | Gene      |
|-----------|-----|-----------|----|----|-----------------------|----------|---------------------|----------|-----------------------|----------|-------------------|-------------|------------|-----------|
|           |     |           |    |    | OR (95% CI)           | P        | OR (95% CI)         | P        | OR (95% CI)           | P        |                   |             |            |           |
| rs6106205 | 20  | 20158867  | C  | T  | 1.11 (1.07, 1.16)     | 5.52E-07 | 1.11 (1.07, 1.16)   | 6.57E-07 | 1.01 (1.00, 1.00)     | 9.99E-01 | No                | No          | G,         | C20orf26  |
| rs1350852 | 18  | 39905989  | A  | G  | 1.11 (1.07, 1.16)     | 7.87E-07 | 1.11 (1.07, 1.16)   | 7.80E-07 | 1.01 (0.91, 1.14)     | 7.97E-01 | No                | No          | G,         | LINC00907 |
| rs952793  | 20  | 6970831   | T  | C  | 1.14 (1.08, 1.19)     | 1.38E-06 | 1.14 (1.08, 1.20)   | 1.18E-06 | 1.06 (0.93, 1.22)     | 3.63E-01 | No                | No          |            |           |
| rs2431718 | 5   | 148853121 | A  | G  | 1.10 (1.06, 1.14)     | 3.12E-06 | 1.10 (1.05, 1.14)   | 4.77E-06 | 1.02 (0.91, 1.13)     | 7.80E-01 | No                | No          |            |           |
| rs2633815 | 3   | 156573214 | G  | A  | 1.12 (1.06, 1.17)     | 9.35E-06 | 1.12 (1.06, 1.17)   | 1.07E-05 | 0.98 (0.86, 1.12)     | 7.60E-01 | No                | No          | G,         | LEKR1     |
| rs414683  | 3   | 156570703 | G  | A  | 1.11 (1.06, 1.17)     | 1.24E-05 | 1.11 (1.06, 1.17)   | 1.41E-05 | 0.98 (0.85, 1.11)     | 7.17E-01 | No                | No          | G,         | RNF141    |
| rs6806773 | 3   | 195571024 | A  | G  | 0.90 (0.85, 0.94)     | 6.44E-06 | 0.90 (0.86, 0.94)   | 1.49E-05 | 0.98 (0.86, 1.10)     | 6.55E-01 | No                | No          |            |           |
| rs1426802 | 12  | 74737650  | T  | C  | 0.91 (0.87, 0.95)     | 2.44E-05 | 0.91 (0.87, 0.95)   | 1.63E-05 | 1.03 (0.93, 1.16)     | 4.97E-01 | No                | No          |            |           |
| rs3865420 | 18  | 56010715  | C  | T  | 0.90 (0.85, 0.94)     | 9.06E-06 | 0.90 (0.85, 0.94)   | 1.72E-05 | 1.07 (0.95, 1.21)     | 2.80E-01 | No                | No          | G,         | NEDD4L    |
| rs7776573 | 7   | 31438342  | C  | A  | 1.10 (1.05, 1.15)     | 3.07E-05 | 1.10 (1.05, 1.15)   | 1.81E-05 | 0.97 (0.86, 1.10)     | 6.94E-01 | No                | No          |            |           |
