# Supplementary material for: Exhaustive Genome-Wide Search for SNP-SNP Interactions Across 10 Human Diseases
Source: PubMed Central journal article supplement (PMC4938657; doi:10.1534/g3.116.028563), 2016-05-12
Supplement: supp_g3.116.028563_TableS19.pdf [file supp_g3.116.028563_TableS19.pdf]

**Table S-19. Top 10 most significant marginal associations, hypertensive disease.**

| RSID      | Chr | Position  | A1 | A0 | Discovery, unadjusted |          | Discovery, adjusted |          | Replication, adjusted |          | Genome-wide sig.? | Replicated? | Annotation | Gene    |
|-----------|-----|-----------|----|----|-----------------------|----------|---------------------|----------|-----------------------|----------|-------------------|-------------|------------|---------|
|           |     |           |    |    | OR (95% CI)           | P        | OR (95% CI)         | P        | OR (95% CI)           | P        |                   |             |            |         |
| rs1275985 | 2   | 26911745  | C  | T  | 1.09 (1.06, 1.12)     | 1.02E-08 | 1.11 (1.07, 1.14)   | 2.82E-10 | 1.17 (1.07, 1.34)     | 1.84E-03 | Yes               | Yes         | G,         | KCNK3   |
| rs1275988 | 2   | 26914364  | C  | T  | 1.08 (1.05, 1.12)     | 3.69E-08 | 1.11 (1.07, 1.14)   | 4.45E-10 | 1.16 (1.06, 1.32)     | 3.53E-03 | Yes               | Yes         | G,         | KCNK3   |
| rs9322334 | 6   | 152200041 | A  | G  | 1.11 (1.07, 1.15)     | 1.65E-09 | 1.11 (1.07, 1.15)   | 6.62E-08 | 0.96 (0.83, 1.08)     | 4.56E-01 | Yes               | No          | D, G,      | ESR1    |
| rs1458038 | 4   | 81164723  | T  | C  | 1.10 (1.06, 1.13)     | 7.22E-09 | 1.10 (1.06, 1.14)   | 7.77E-08 | 1.04 (0.92, 1.18)     | 5.19E-01 | Yes               | No          |            |         |
| rs9322335 | 6   | 152200129 | T  | C  | 1.10 (1.06, 1.14)     | 1.26E-08 | 1.10 (1.06, 1.14)   | 2.87E-07 | 0.99 (0.87, 1.13)     | 8.84E-01 | No                | No          | D, G,      | ESR1    |
| rs7112413 | 11  | 10265500  | T  | C  | 1.08 (1.04, 1.12)     | 6.38E-05 | 1.11 (1.06, 1.15)   | 8.32E-07 | 0.91 (0.80, 1.07)     | 2.76E-01 | No                | No          | G,         | SBF2    |
| rs2627321 | 15  | 81022569  | T  | C  | 1.07 (1.04, 1.10)     | 1.36E-06 | 1.08 (1.05, 1.11)   | 1.84E-06 | 1.01 (0.93, 1.16)     | 4.93E-01 | No                | No          | G,         | ABHD17C |
| rs4845953 | 1   | 10801989  | G  | A  | 1.06 (1.03, 1.09)     | 2.33E-05 | 1.08 (1.05, 1.11)   | 2.07E-06 | 1.00 (0.91, 1.14)     | 7.28E-01 | No                | No          | R, D, G,   | CASZ1   |
| rs7173751 | 15  | 80998903  | A  | G  | 1.07 (1.04, 1.10)     | 1.47E-06 | 1.08 (1.04, 1.11)   | 2.81E-06 | 1.04 (0.94, 1.18)     | 3.78E-01 | No                | No          | G,         | ABHD17C |
| rs2596126 | 8   | 76640621  | G  | A  | 0.94 (0.91, 0.97)     | 2.08E-05 | 0.93 (0.90, 0.96)   | 3.18E-06 | 1.07 (0.96, 1.21)     | 1.81E-01 | No                | No          |            |         |
