# Supplementary material for: Exhaustive Genome-Wide Search for SNP-SNP Interactions Across 10 Human Diseases
Source: PubMed Central journal article supplement (PMC4938657; doi:10.1534/g3.116.028563), 2016-05-12
Supplement: supp_g3.116.028563_TableS20.pdf [file supp_g3.116.028563_TableS20.pdf]

**Table S-20. Top 10 most significant marginal associations, osteoarthritis.**

| RSID       | Chr | Position  | A1 | A0 | Discovery, unadjusted |          | Discovery, adjusted |          | Replication, adjusted |          | Genome-wide sig.? | Replicated? | Annotation | Gene   |
|------------|-----|-----------|----|----|-----------------------|----------|---------------------|----------|-----------------------|----------|-------------------|-------------|------------|--------|
|            |     |           |    |    | OR (95% CI)           | P        | OR (95% CI)         | P        | OR (95% CI)           | P        |                   |             |            |        |
| rs6925021  | 6   | 156588729 | A  | G  | 0.94 (0.91, 0.97)     | 2.96E-04 | 0.92 (0.89, 0.95)   | 1.92E-06 | 1.05 (0.94, 1.19)     | 3.62E-01 | No                | No          |            |        |
| rs2083418  | 2   | 42335185  | T  | C  | 0.94 (0.92, 0.97)     | 6.36E-05 | 0.93 (0.90, 0.96)   | 3.70E-06 | 1.09 (0.96, 1.20)     | 2.13E-01 | No                | No          | R,         |        |
| rs1017476  | 2   | 42324553  | C  | A  | 0.94 (0.91, 0.97)     | 4.10E-05 | 0.93 (0.90, 0.96)   | 4.47E-06 | 1.10 (0.98, 1.23)     | 1.16E-01 | No                | No          |            |        |
| rs36039266 | 3   | 14303604  | C  | T  | 0.93 (0.90, 0.95)     | 1.27E-06 | 0.93 (0.89, 0.96)   | 7.24E-06 | 0.94 (0.84, 1.07)     | 3.65E-01 | No                | No          |            |        |
| rs828152   | 4   | 17063564  | T  | C  | 0.93 (0.90, 0.97)     | 9.28E-04 | 0.91 (0.87, 0.95)   | 1.91E-05 | 1.05 (0.87, 1.18)     | 8.70E-01 | No                | No          |            |        |
| rs11508026 | 16  | 56999328  | T  | C  | 1.06 (1.03, 1.09)     | 7.74E-05 | 1.07 (1.04, 1.10)   | 2.10E-05 | 1.01 (0.91, 1.12)     | 8.54E-01 | No                | No          | G,         | CETP   |
| rs9514592  | 13  | 107558936 | T  | C  | 0.94 (0.91, 0.97)     | 1.54E-04 | 0.93 (0.90, 0.96)   | 2.83E-05 | 1.03 (0.93, 1.18)     | 4.33E-01 | No                | No          |            |        |
| rs77242996 | 3   | 73683549  | G  | A  | 0.94 (0.91, 0.97)     | 1.55E-05 | 0.94 (0.91, 0.97)   | 3.01E-05 | 1.01 (0.89, 1.11)     | 8.75E-01 | No                | No          |            |        |
| rs9404236  | 6   | 103186025 | A  | G  | 1.09 (1.05, 1.13)     | 1.05E-05 | 1.09 (1.05, 1.13)   | 3.41E-05 | 0.96 (0.85, 1.14)     | 8.28E-01 | No                | No          |            |        |
| rs12407873 | 1   | 167796012 | C  | A  | 1.06 (1.03, 1.09)     | 1.24E-04 | 1.07 (1.03, 1.10)   | 4.11E-05 | 1.06 (0.95, 1.19)     | 2.83E-01 | No                | No          | G,         | ADCY10 |
