# Supplementary material for: Exhaustive Genome-Wide Search for SNP-SNP Interactions Across 10 Human Diseases
Source: PubMed Central journal article supplement (PMC4938657; doi:10.1534/g3.116.028563), 2016-05-12
Supplement: supp_g3.116.028563_TableS21.pdf [file supp_g3.116.028563_TableS21.pdf]

**Table S-21. Enrichment analysis (allergic rhinitis).**

| Annotation     | Match group | FastEpistasis / logistic regression |             |          |                            |          | BOOST    |         |          |                            |          |
|----------------|-------------|-------------------------------------|-------------|----------|----------------------------|----------|----------|---------|----------|----------------------------|----------|
|                |             | N, total                            | N, rep. (%) | Enrich P | Min Int P                  | Thresh   | N, total | N, rep. | Enrich P | Min Int P                  | Thresh   |
| Exonic         | None        | 3367                                | 2.4         | 0.627    | A: 8.61E-11<br>R: 2.08E-09 | 1.13E-12 | 3790     | 5.2     | 0.014    | A: 3.92E-11<br>R: 1.14E-09 | 1.13E-12 |
|                | Either      | 46                                  | 0           |          | A: 2.85E-09<br>R: N/A      | 6.39E-11 | 61       | 13.1    |          | A: 1.78E-10<br>R: 8.34E-09 | 6.39E-11 |
|                | Both        | 0                                   | 0           |          | A: N/A<br>R: N/A           | 1.45E-08 | 0        | 0       |          | A: N/A<br>R: N/A           | 1.45E-08 |
| Reg. 1,2, or 3 | None        | 3151                                | 2.4         | 0.700    | A: 8.61E-11<br>R: 2.08E-09 | 1.21E-12 | 3559     | 5.1     | 0.215    | A: 3.92E-11<br>R: 1.14E-09 | 1.21E-12 |
|                | Either      | 258                                 | 2.7         |          | A: 8.02E-10<br>R: 2.20E-08 | 1.42E-11 | 289      | 7.6     |          | A: 4.88E-10<br>R: 5.07E-09 | 1.42E-11 |
|                | Both        | 4                                   | 0           |          | A: 5.47E-09<br>R: N/A      | 6.73E-10 | 3        | 0       |          | A: 4.48E-08<br>R: N/A      | 6.73E-10 |
| Disease EQTL   | None        | 3406                                | 2.4         | 1.000    | A: 8.61E-11<br>R: 2.08E-09 | 1.12E-12 | 3836     | 5.3     | 1.000    | A: 3.92E-11<br>R: 1.14E-09 | 1.12E-12 |
|                | Either      | 7                                   | 0           |          | A: 1.77E-08<br>R: N/A      | 1.96E-10 | 15       | 0       |          | A: 3.14E-09<br>R: N/A      | 1.96E-10 |
|                | Both        | 0                                   | 0           |          | A: N/A<br>R: N/A           | 1.38E-07 | 0        | 0       |          | A: N/A<br>R: N/A           | 1.38E-07 |
| Disease gene   | None        | 3401                                | 2.4         | 1.000    | A: 8.61E-11<br>R: 2.08E-09 | 1.12E-12 | 3840     | 5.3     | 0.112    | A: 3.92E-11<br>R: 1.14E-09 | 1.12E-12 |
|                | Either      | 12                                  | 0           |          | A: 8.22E-09<br>R: N/A      | 1.96E-10 | 11       | 18.2    |          | A: 3.03E-08<br>R: 5.74E-08 | 1.96E-10 |
|                | Both        | 0                                   | 0           |          | A: N/A<br>R: N/A           | 1.38E-07 | 0        | 0       |          | A: N/A<br>R: N/A           | 1.38E-07 |
| Any gene       | None        | 1060                                | 2.3         | 0.266    | A: 2.17E-10<br>R: 2.15E-09 | 3.75E-12 | 1186     | 4.5     | 0.278    | A: 2.73E-10<br>R: 1.86E-09 | 3.75E-12 |
|                | Either      | 1678                                | 2.7         |          | A: 8.61E-11<br>R: 2.08E-09 | 2.24E-12 | 1896     | 5.5     |          | A: 7.64E-11<br>R: 1.48E-09 | 2.24E-12 |
|                | Both        | 675                                 | 1.6         |          | A: 2.38E-10<br>R: 1.97E-08 | 5.34E-12 | 769      | 6.0     |          | A: 3.92E-11<br>R: 1.14E-09 | 5.34E-12 |
| Marginal       | None        | 3047                                | 2.5         | 0.240    | A: 8.61E-11<br>R: 2.08E-09 | 1.24E-12 | 3417     | 5.1     | 0.152    | A: 3.92E-11<br>R: 1.14E-09 | 1.24E-12 |
|                | Either      | 352                                 | 1.4         |          | A: 9.04E-11<br>R: 2.63E-08 | 1.08E-11 | 415      | 7.0     |          | A: 4.53E-10<br>R: 1.87E-09 | 1.08E-11 |
|                | Both        | 14                                  | 7.1         |          | A: 8.36E-09<br>R: 8.28E-08 | 3.78E-10 | 19       | 10.5    |          | A: 3.23E-08<br>R: 4.48E-08 | 3.78E-10 |

Followed-up interactions (interactions with  $P < 10^{-7}$  in either the FastEpistasis or BOOST analyses) were grouped by the number of SNPs that match a particular annotation category (**Match group**: none, either, or both SNPs matching). Annotation categories are described in the Supplemental Methods section. **N, total**: total number of interactions in each annotation match group. **N, rep (%)**: percentage of the total that were nominally replicated. **Enrich P**: enrichment test P-value (testing if there is a significant difference between percentages of nominally replicated interactions among the different annotation match groups; chi-square test or Fisher’s exact test). **Min Int P**: among all interactions in the particular annotation match category, the P-value of the most significant interaction (A), and the P-value of the most significant nominally replicated interaction (R). **Thresh**: hypothetical significance threshold assuming that the search space was first trimmed to only include SNP pairs corresponding to the particular annotation match group. Green shading: enrichment P-value < 0.05. Cyan shading: a “Min Int P” value that is less than the respective “Thresh”.
