# Supplementary material for: Exhaustive Genome-Wide Search for SNP-SNP Interactions Across 10 Human Diseases
Source: PubMed Central journal article supplement (PMC4938657; doi:10.1534/g3.116.028563), 2016-05-12
Supplement: supp_g3.116.028563_TableS22.pdf [file supp_g3.116.028563_TableS22.pdf]

**Table S-22. Enrichment analysis (asthma).**

| Annotation     | Match group | FastEpistasis / logistic regression |             |          |                            |          | BOOST    |         |          |                            |          |
|----------------|-------------|-------------------------------------|-------------|----------|----------------------------|----------|----------|---------|----------|----------------------------|----------|
|                |             | N, total                            | N, rep. (%) | Enrich P | Min Int P                  | Thresh   | N, total | N, rep. | Enrich P | Min Int P                  | Thresh   |
| Exonic         | None        | 3303                                | 2.2         | 0.626    | A: 2.50E-11<br>R: 3.53E-10 | 1.13E-12 | 3913     | 4.9     | 0.100    | A: 2.55E-11<br>R: 8.78E-10 | 1.13E-12 |
|                | Either      | 45                                  | 0           |          | A: 3.90E-09<br>R: N/A      | 6.38E-11 | 54       | 11.1    |          | A: 4.19E-09<br>R: 1.90E-08 | 6.38E-11 |
|                | Both        | 0                                   | 0           |          | A: N/A<br>R: N/A           | 1.45E-08 | 1        | 0       |          | A: 6.77E-08<br>R: N/A      | 1.45E-08 |
| Reg. 1,2, or 3 | None        | 3109                                | 2.1         | 0.366    | A: 2.50E-11<br>R: 3.53E-10 | 1.20E-12 | 3669     | 4.8     | 0.152    | A: 2.55E-11<br>R: 8.78E-10 | 1.20E-12 |
|                | Either      | 238                                 | 2.9         |          | A: 2.52E-10<br>R: 1.49E-09 | 1.42E-11 | 291      | 7.2     |          | A: 5.19E-11<br>R: 6.90E-09 | 1.42E-11 |
|                | Both        | 1                                   | 0           |          | A: 1.94E-08<br>R: N/A      | 6.76E-10 | 8        | 0       |          | A: 9.61E-10<br>R: N/A      | 6.76E-10 |
| Disease EQTL   | None        | 3327                                | 2.1         | 0.074    | A: 2.50E-11<br>R: 3.53E-10 | 1.12E-12 | 3943     | 5.0     | 0.648    | A: 2.55E-11<br>R: 8.78E-10 | 1.12E-12 |
|                | Either      | 21                                  | 9.5         |          | A: 1.84E-09<br>R: 1.77E-08 | 9.16E-11 | 24       | 0       |          | A: 6.01E-10<br>R: N/A      | 9.16E-11 |
|                | Both        | 0                                   | 0           |          | A: N/A<br>R: N/A           | 3.00E-08 | 1        | 0       |          | A: 9.14E-08<br>R: N/A      | 3.00E-08 |
| Disease gene   | None        | 3068                                | 2.1         | 0.227    | A: 2.50E-11<br>R: 3.53E-10 | 1.21E-12 | 3634     | 5.1     | 0.313    | A: 2.55E-11<br>R: 8.78E-10 | 1.21E-12 |
|                | Either      | 278                                 | 3.2         |          | A: 6.27E-11<br>R: 1.29E-09 | 1.35E-11 | 327      | 3.4     |          | A: 5.19E-11<br>R: 3.64E-09 | 1.35E-11 |
|                | Both        | 2                                   | 0           |          | A: 5.02E-10<br>R: N/A      | 6.06E-10 | 7        | 0       |          | A: 2.77E-09<br>R: N/A      | 6.06E-10 |
| Any gene       | None        | 1057                                | 2.0         | 0.831    | A: 2.50E-11<br>R: 1.27E-08 | 3.72E-12 | 1202     | 5.2     | 0.351    | A: 1.28E-10<br>R: 2.87E-09 | 3.72E-12 |
|                | Either      | 1631                                | 2.2         |          | A: 8.34E-11<br>R: 3.53E-10 | 2.23E-12 | 1983     | 5.2     |          | A: 2.55E-11<br>R: 1.00E-09 | 2.23E-12 |
|                | Both        | 660                                 | 2.4         |          | A: 6.27E-11<br>R: 1.86E-09 | 5.36E-12 | 783      | 4.0     |          | A: 3.02E-10<br>R: 8.78E-10 | 5.36E-12 |
| Marginal       | None        | 2978                                | 2.2         | 0.069    | A: 2.50E-11<br>R: 3.53E-10 | 1.24E-12 | 3568     | 4.9     | 0.753    | A: 2.55E-11<br>R: 8.78E-10 | 1.24E-12 |
|                | Either      | 363                                 | 1.7         |          | A: 1.89E-10<br>R: 5.42E-08 | 1.04E-11 | 390      | 5.1     |          | A: 2.52E-10<br>R: 1.90E-08 | 1.04E-11 |
|                | Both        | 7                                   | 14.3        |          | A: 1.03E-08<br>R: 1.03E-08 | 3.47E-10 | 10       | 10.0    |          | A: 5.67E-09<br>R: 6.51E-09 | 3.47E-10 |

Followed-up interactions (interactions with  $P < 10^{-7}$  in either the FastEpistasis or BOOST analyses) were grouped by the number of SNPs that match a particular annotation category (**Match group**: none, either, or both SNPs matching). Annotation categories are described in the Supplemental Methods section. **N, total**: total number of interactions in each annotation match group. **N, rep (%)**: percentage of the total that were nominally replicated. **Enrich P**: enrichment test P-value (testing if there is a significant difference between percentages of nominally replicated interactions among the different annotation match groups; chi-square test or Fisher's exact test). **Min Int P**: among all interactions in the particular annotation match category, the P-value of the most significant interaction (A), and the P-value of the most significant nominally replicated interaction (R). **Thresh**: hypothetical significance threshold assuming that the search space was first trimmed to only include SNP pairs corresponding to the particular annotation match group. Green shading: enrichment P-value  $< 0.05$ . Cyan shading: a "Min Int P" value that is less than the respective "Thresh".
