# Supplementary material for: Exhaustive Genome-Wide Search for SNP-SNP Interactions Across 10 Human Diseases
Source: PubMed Central journal article supplement (PMC4938657; doi:10.1534/g3.116.028563), 2016-05-12
Supplement: supp_g3.116.028563_TableS23.pdf [file supp_g3.116.028563_TableS23.pdf]

**Table S-23. Enrichment analysis (cardiac disease).**

| Annotation     | Match group | FastEpistasis / logistic regression |             |          |                            |          | BOOST    |         |          |                            |          |
|----------------|-------------|-------------------------------------|-------------|----------|----------------------------|----------|----------|---------|----------|----------------------------|----------|
|                |             | N, total                            | N, rep. (%) | Enrich P | Min Int P                  | Thresh   | N, total | N, rep. | Enrich P | Min Int P                  | Thresh   |
| Exonic         | None        | 3421                                | 2.6         | 1.000    | A: 1.64E-11<br>R: 4.19E-09 | 1.12E-12 | 3919     | 5.5     | 1.000    | A: 6.54E-11<br>R: 4.51E-10 | 1.12E-12 |
|                | Either      | 33                                  | 0           |          | A: 9.75E-11<br>R: N/A      | 6.38E-11 | 47       | 4.3     |          | A: 2.35E-09<br>R: 3.63E-08 | 6.38E-11 |
|                | Both        | 0                                   | 0           |          | A: N/A<br>R: N/A           | 1.45E-08 | 0        | 0       |          | A: N/A<br>R: N/A           | 1.45E-08 |
| Reg. 1,2, or 3 | None        | 3209                                | 2.6         | 0.852    | A: 1.64E-11<br>R: 4.19E-09 | 1.20E-12 | 3656     | 5.5     | 1.000    | A: 6.54E-11<br>R: 4.51E-10 | 1.20E-12 |
|                | Either      | 240                                 | 2.1         |          | A: 2.12E-11<br>R: 7.65E-08 | 1.42E-11 | 308      | 5.2     |          | A: 1.82E-10<br>R: 7.78E-09 | 1.42E-11 |
|                | Both        | 5                                   | 0           |          | A: 4.56E-09<br>R: N/A      | 6.73E-10 | 2        | 0       |          | A: 2.40E-08<br>R: N/A      | 6.73E-10 |
| Disease EQTL   | None        | 3425                                | 2.5         | 0.528    | A: 1.64E-11<br>R: 4.19E-09 | 1.12E-12 | 3926     | 5.5     | 0.480    | A: 6.54E-11<br>R: 4.51E-10 | 1.12E-12 |
|                | Either      | 29                                  | 3.5         |          | A: 3.67E-09<br>R: 2.40E-07 | 7.16E-11 | 40       | 7.5     |          | A: 1.62E-09<br>R: 6.67E-09 | 7.16E-11 |
|                | Both        | 0                                   | 0           |          | A: N/A<br>R: N/A           | 1.83E-08 | 0        | 0       |          | A: N/A<br>R: N/A           | 1.83E-08 |
| Disease gene   | None        | 2837                                | 2.8         | 0.084    | A: 1.64E-11<br>R: 4.19E-09 | 1.35E-12 | 3229     | 5.6     | 0.462    | A: 6.54E-11<br>R: 4.51E-10 | 1.35E-12 |
|                | Either      | 586                                 | 1.4         |          | A: 2.19E-11<br>R: 1.81E-07 | 6.37E-12 | 691      | 4.9     |          | A: 8.54E-11<br>R: 3.37E-09 | 6.37E-12 |
|                | Both        | 31                                  | 0           |          | A: 9.72E-09<br>R: N/A      | 1.20E-10 | 46       | 2.2     |          | A: 2.75E-09<br>R: 7.20E-08 | 1.20E-10 |
| Any gene       | None        | 1088                                | 3.4         | 0.067    | A: 1.64E-11<br>R: 1.36E-08 | 3.72E-12 | 1185     | 6.2     | 0.426    | A: 1.16E-10<br>R: 4.51E-10 | 3.72E-12 |
|                | Either      | 1668                                | 2.3         |          | A: 2.12E-11<br>R: 4.19E-09 | 2.23E-12 | 1973     | 5.1     |          | A: 6.54E-11<br>R: 1.25E-09 | 2.23E-12 |
|                | Both        | 698                                 | 1.7         |          | A: 9.75E-11<br>R: 4.97E-09 | 5.34E-12 | 808      | 5.5     |          | A: 8.54E-11<br>R: 2.15E-09 | 5.34E-12 |
| Marginal       | None        | 3086                                | 2.5         | 8.03E-05 | A: 1.64E-11<br>R: 4.19E-09 | 1.24E-12 | 3543     | 5.2     | 1.15E-04 | A: 6.54E-11<br>R: 4.51E-10 | 1.24E-12 |
|                | Either      | 353                                 | 2.0         |          | A: 3.18E-10<br>R: 3.94E-08 | 1.08E-11 | 415      | 7.0     |          | A: 3.37E-10<br>R: 2.15E-09 | 1.08E-11 |
|                | Both        | 15                                  | 20.0 *      |          | A: 1.29E-08<br>R: 1.09E-07 | 3.77E-10 | 8        | 37.5    |          | A: 1.23E-08<br>R: 1.23E-08 | 3.77E-10 |

Followed-up interactions (interactions with  $P < 10^{-7}$  in either the FastEpistasis or BOOST analyses) were grouped by the number of SNPs that match a particular annotation category (**Match group**: none, either, or both SNPs matching). Annotation categories are described in the Supplemental Methods section. **N, total**: total number of interactions in each annotation match group. **N, rep (%)**: percentage of the total that were nominally replicated. **Enrich P**: enrichment test P-value (testing if there is a significant difference between percentages of nominally replicated interactions among the different annotation match groups; chi-square test or Fisher's exact test). **Min Int P**: among all interactions in the particular annotation match category, the P-value of the most significant interaction (A), and the P-value of the most significant nominally replicated interaction (R). **Thresh**: hypothetical significance threshold assuming that the search space was first trimmed to only include SNP pairs corresponding to the particular annotation match group. Green shading: enrichment P-value  $< 0.05$ . Cyan shading: a "Min Int P" value that is less than the respective "Thresh".

\* The three interactions that were nominally replicated (among FastEpistasis-identified interactions where both SNPs were marginally significant; i.e., 20.0% of 15 in the table above) were the following: rs17018095 × rs2206426, rs10485227 × rs61352759, rs11768588 × rs11105883.
