# Supplementary material for: Exhaustive Genome-Wide Search for SNP-SNP Interactions Across 10 Human Diseases
Source: PubMed Central journal article supplement (PMC4938657; doi:10.1534/g3.116.028563), 2016-05-12
Supplement: supp_g3.116.028563_TableS24.pdf [file supp_g3.116.028563_TableS24.pdf]

**Table S-24. Enrichment analysis (depression).**

| Annotation     | Match group | FastEpistasis / logistic regression |             |          |                            |          | BOOST    |         |          |                            |          |
|----------------|-------------|-------------------------------------|-------------|----------|----------------------------|----------|----------|---------|----------|----------------------------|----------|
|                |             | N, total                            | N, rep. (%) | Enrich P | Min Int P                  | Thresh   | N, total | N, rep. | Enrich P | Min Int P                  | Thresh   |
| Exonic         | None        | 3435                                | 2.5         | 0.188    | A: 1.81E-11<br>R: 1.26E-10 | 1.13E-12 | 3838     | 5.3     | 0.6000   | A: 4.85E-11<br>R: 6.16E-10 | 1.13E-12 |
|                | Either      | 32                                  | 6.3         |          | A: 4.57E-10<br>R: 4.11E-08 | 6.40E-11 | 59       | 6.8     |          | A: 1.31E-09<br>R: 1.40E-08 | 6.40E-11 |
|                | Both        | 0                                   | 0           |          | A: N/A<br>R: N/A           | 1.45E-08 | 2        | 0       |          | A: 7.60E-08<br>R: N/A      | 1.45E-08 |
| Reg. 1,2, or 3 | None        | 3209                                | 2.4         | 0.561    | A: 1.81E-11<br>R: 1.26E-10 | 1.21E-12 | 3607     | 5.4     | 0.574    | A: 4.85E-11<br>R: 6.16E-10 | 1.21E-12 |
|                | Either      | 255                                 | 3.1         |          | A: 6.88E-10<br>R: 1.18E-09 | 1.43E-11 | 286      | 4.2     |          | A: 5.34E-11<br>R: 5.34E-09 | 1.43E-11 |
|                | Both        | 3                                   | 0           |          | A: 9.33E-09<br>R: N/A      | 6.75E-10 | 6        | 0       |          | A: 1.64E-08<br>R: N/A      | 6.75E-10 |
| Disease EQTL   | None        | 3461                                | 2.5         | 1.000    | A: 1.81E-11<br>R: 1.26E-10 | 1.11E-12 | 3894     | 5.3     | 1.000    | A: 4.85E-11<br>R: 6.16E-10 | 1.11E-12 |
|                | Either      | 6                                   | 0           |          | A: 9.54E-09<br>R: N/A      | 5.50E-10 | 5        | 0       |          | A: 1.74E-08<br>R: N/A      | 5.50E-10 |
|                | Both        | 0                                   | 0           |          | A: N/A<br>R: N/A           | 1.09E-06 | 0        | 0       |          | A: N/A<br>R: N/A           | 1.09E-06 |
| Disease gene   | None        | 3341                                | 2.5         | 0.374    | A: 1.81E-11<br>R: 1.26E-10 | 1.16E-12 | 3742     | 5.4     | 0.315    | A: 4.85E-11<br>R: 6.16E-10 | 1.16E-12 |
|                | Either      | 126                                 | 0.8         |          | A: 5.14E-10<br>R: 1.38E-07 | 2.68E-11 | 156      | 3.2     |          | A: 1.20E-09<br>R: 4.67E-09 | 2.68E-11 |
|                | Both        | 0                                   | 0           |          | A: N/A<br>R: N/A           | 2.48E-09 | 1        | 0       |          | A: 7.88E-08<br>R: N/A      | 2.48E-09 |
| Any gene       | None        | 1078                                | 2.1         | 0.494    | A: 1.71E-10<br>R: 2.79E-10 | 3.74E-12 | 1135     | 6.4     | 0.134    | A: 1.16E-10<br>R: 3.96E-09 | 3.74E-12 |
|                | Either      | 1733                                | 2.5         |          | A: 1.81E-11<br>R: 1.26E-10 | 2.24E-12 | 1993     | 4.9     |          | A: 4.85E-11<br>R: 6.16E-10 | 2.24E-12 |
|                | Both        | 656                                 | 3.1         |          | A: 1.33E-10<br>R: 1.18E-09 | 5.36E-12 | 771      | 4.8     |          | A: 1.90E-10<br>R: 1.36E-09 | 5.36E-12 |
| Marginal       | None        | 3135                                | 2.6         | 0.468    | A: 1.81E-11<br>R: 1.26E-10 | 1.23E-12 | 3541     | 5.3     | 0.638    | A: 4.85E-11<br>R: 6.16E-10 | 1.23E-12 |
|                | Either      | 324                                 | 1.5         |          | A: 1.33E-10<br>R: 3.12E-08 | 1.13E-11 | 345      | 5.8     |          | A: 5.34E-11<br>R: 7.37E-09 | 1.13E-11 |
|                | Both        | 8                                   | 0           |          | A: 1.07E-08<br>R: N/A      | 4.13E-10 | 13       | 0       |          | A: 1.23E-08<br>R: N/A      | 4.13E-10 |

Followed-up interactions (interactions with  $P < 10^{-7}$  in either the FastEpistasis or BOOST analyses) were grouped by the number of SNPs that match a particular annotation category (**Match group**: none, either, or both SNPs matching). Annotation categories are described in the Supplemental Methods section. **N, total**: total number of interactions in each annotation match group. **N, rep (%)**: percentage of the total that were nominally replicated. **Enrich P**: enrichment test P-value (testing if there is a significant difference between percentages of nominally replicated interactions among the different annotation match groups; chi-square test or Fisher's exact test). **Min Int P**: among all interactions in the particular annotation match category, the P-value of the most significant interaction (A), and the P-value of the most significant nominally replicated interaction (R). **Thresh**: hypothetical significance threshold assuming that the search space was first trimmed to only include SNP pairs corresponding to the particular annotation match group. Green shading: enrichment P-value  $< 0.05$ . Cyan shading: a "Min Int P" value that is less than the respective "Thresh".
