# Supplementary material for: Exhaustive Genome-Wide Search for SNP-SNP Interactions Across 10 Human Diseases
Source: PubMed Central journal article supplement (PMC4938657; doi:10.1534/g3.116.028563), 2016-05-12
Supplement: supp_g3.116.028563_TableS25.pdf [file supp_g3.116.028563_TableS25.pdf]

**Table S-25. Enrichment analysis (dermatophytosis).**

| Annotation     | Match group | FastEpistasis / logistic regression |             |          |                            |          | BOOST    |         |          |                            |          |
|----------------|-------------|-------------------------------------|-------------|----------|----------------------------|----------|----------|---------|----------|----------------------------|----------|
|                |             | N, total                            | N, rep. (%) | Enrich P | Min Int P                  | Thresh   | N, total | N, rep. | Enrich P | Min Int P                  | Thresh   |
| Exonic         | None        | 3578                                | 2.6         | 0.395    | A: 4.29E-13<br>R: 1.87E-09 | 1.13E-12 | 4000     | 4.8     | 0.540    | A: 1.20E-12<br>R: 3.22E-10 | 1.13E-12 |
|                | Either      | 50                                  | 4.0         |          | A: 1.06E-09<br>R: 1.06E-09 | 6.39E-11 | 50       | 2.0     |          | A: 3.21E-09<br>R: 9.07E-08 | 6.39E-11 |
|                | Both        | 1                                   | 0           |          | A: 1.59E-08<br>R: N/A      | 1.45E-08 | 1        | 0       |          | A: 4.22E-09<br>R: N/A      | 1.45E-08 |
| Reg. 1,2, or 3 | None        | 3354                                | 2.6         | 0.716    | A: 4.29E-13<br>R: 1.87E-09 | 1.20E-12 | 3765     | 4.8     | 0.158    | A: 1.20E-12<br>R: 3.22E-10 | 1.20E-12 |
|                | Either      | 272                                 | 2.9         |          | A: 1.20E-10<br>R: 1.06E-09 | 1.43E-11 | 283      | 5.0     |          | A: 4.08E-10<br>R: 1.99E-08 | 1.43E-11 |
|                | Both        | 3                                   | 0           |          | A: 2.93E-10<br>R: N/A      | 6.75E-10 | 3        | 33.0    |          | A: 6.13E-08<br>R: 9.13E-08 | 6.75E-10 |
| Disease EQTL   | None        | 3629                                | 2.6         | N/A      | A: 4.29E-13<br>R: 1.06E-09 | 1.11E-12 | 4050     | 4.8     | 1.000    | A: 1.20E-12<br>R: 3.22E-10 | 1.11E-12 |
|                | Either      | 0                                   | 0           |          | A: N/A<br>R: N/A           | 2.78E-08 | 1        | 0       |          | A: 1.69E-08<br>R: N/A      | 2.78E-08 |
|                | Both        | 0                                   | 0           |          | A: N/A<br>R: N/A           | 3.33E-03 | 0        | 0       |          | A: N/A<br>R: N/A           | 3.33E-03 |
| Disease gene   | None        | 3629                                | 2.6         | N/A      | A: 4.29E-13<br>R: 1.06E-09 | 1.11E-12 | 4050     | 4.8     | 1.000    | A: 1.20E-12<br>R: 3.22E-10 | 1.11E-12 |
|                | Either      | 0                                   | 0           |          | A: N/A<br>R: N/A           | 6.40E-09 | 1        | 0       |          | A: 1.69E-08<br>R: N/A      | 6.40E-09 |
|                | Both        | 0                                   | 0           |          | A: N/A<br>R: N/A           | 1.54E-04 | 0        | 0       |          | A: N/A<br>R: N/A           | 1.54E-04 |
| Any gene       | None        | 1112                                | 2.3         | 0.650    | A: 9.63E-12<br>R: 2.89E-09 | 3.74E-12 | 1235     | 5.5     | 0.355    | A: 1.69E-10<br>R: 1.15E-09 | 3.74E-12 |
|                | Either      | 1804                                | 2.8         |          | A: 4.29E-13<br>R: 1.06E-09 | 2.24E-12 | 2004     | 4.5     |          | A: 1.20E-12<br>R: 1.29E-09 | 2.24E-12 |
|                | Both        | 713                                 | 2.8         |          | A: 1.75E-10<br>R: 1.87E-09 | 5.35E-12 | 812      | 4.3     |          | A: 7.23E-11<br>R: 3.22E-10 | 5.35E-12 |
| Marginal       | None        | 3237                                | 2.8         | 0.109    | A: 4.29E-13<br>R: 1.06E-09 | 1.24E-12 | 3629     | 4.8     | 0.572    | A: 5.20E-11<br>R: 3.22E-10 | 1.24E-12 |
|                | Either      | 384                                 | 1.0         |          | A: 5.27E-11<br>R: 5.13E-09 | 1.09E-11 | 403      | 5.2     |          | A: 1.20E-12<br>R: 1.29E-09 | 1.09E-11 |
|                | Both        | 8                                   | 0           |          | A: 2.67E-08<br>R: N/A      | 3.86E-10 | 19       | 0       |          | A: 5.13E-09<br>R: N/A      | 3.86E-10 |

Followed-up interactions (interactions with  $P < 10^{-7}$  in either the FastEpistasis or BOOST analyses) were grouped by the number of SNPs that match a particular annotation category (**Match group**: none, either, or both SNPs matching). Annotation categories are described in the Supplemental Methods section. **N, total**: total number of interactions in each annotation match group. **N, rep (%)**: percentage of the total that were nominally replicated. **Enrich P**: enrichment test P-value (testing if there is a significant difference between percentages of nominally replicated interactions among the different annotation match groups; chi-square test or Fisher's exact test). **Min Int P**: among all interactions in the particular annotation match category, the P-value of the most significant interaction (A), and the P-value of the most significant nominally replicated interaction (R). **Thresh**: hypothetical significance threshold assuming that the search space was first trimmed to only include SNP pairs corresponding to the particular annotation match group. Green shading: enrichment P-value  $< 0.05$ . Cyan shading: a "Min Int P" value that is less than the respective "Thresh".
