# Supplementary material for: Exhaustive Genome-Wide Search for SNP-SNP Interactions Across 10 Human Diseases
Source: PubMed Central journal article supplement (PMC4938657; doi:10.1534/g3.116.028563), 2016-05-12
Supplement: supp_g3.116.028563_TableS26.pdf [file supp_g3.116.028563_TableS26.pdf]

**Table S-26. Enrichment analysis (diabetes, type 2).**

| Annotation     | Match group | FastEpistasis / logistic regression |             |          |                            |          | BOOST    |         |          |                            |          |
|----------------|-------------|-------------------------------------|-------------|----------|----------------------------|----------|----------|---------|----------|----------------------------|----------|
|                |             | N, total                            | N, rep. (%) | Enrich P | Min Int P                  | Thresh   | N, total | N, rep. | Enrich P | Min Int P                  | Thresh   |
| Exonic         | None        | 3248                                | 2.3         | 0.615    | A: 1.02E-10<br>R: 3.11E-10 | 1.13E-12 | 3912     | 4.7     | 0.697    | A: 2.33E-11<br>R: 2.69E-11 | 1.13E-12 |
|                | Either      | 40                                  | 2.5         |          | A: 2.25E-09<br>R: 4.33E-09 | 6.41E-11 | 38       | 5.3     |          | A: 7.22E-09<br>R: 7.22E-09 | 6.41E-11 |
|                | Both        | 0                                   | 0           |          | A: N/A<br>R: N/A           | 1.46E-08 | 0        | 0       |          | A: N/A<br>R: N/A           | 1.46E-08 |
| Reg. 1,2, or 3 | None        | 3042                                | 2.4         | 0.695    | A: 1.02E-10<br>R: 3.11E-10 | 1.20E-12 | 3627     | 4.8     | 0.496    | A: 2.33E-11<br>R: 2.69E-11 | 1.20E-12 |
|                | Either      | 241                                 | 1.7         |          | A: 2.30E-10<br>R: 2.76E-08 | 1.42E-11 | 317      | 3.5     |          | A: 5.62E-10<br>R: 8.34E-09 | 1.42E-11 |
|                | Both        | 5                                   | 0           |          | A: 4.79E-08<br>R: N/A      | 6.74E-10 | 6        | 0       |          | A: 2.55E-09<br>R: N/A      | 6.74E-10 |
| Disease EQTL   | None        | 3253                                | 2.3         | 0.566    | A: 1.02E-10<br>R: 3.11E-10 | 1.13E-12 | 3901     | 4.7     | 0.727    | A: 2.33E-11<br>R: 2.69E-11 | 1.13E-12 |
|                | Either      | 35                                  | 2.9         |          | A: 4.48E-09<br>R: 7.68E-08 | 5.90E-11 | 49       | 2.0     |          | A: 2.32E-09<br>R: 1.59E-08 | 5.90E-11 |
|                | Both        | 0                                   | 0           |          | A: N/A<br>R: N/A           | 1.23E-08 | 0        | 0       |          | A: N/A<br>R: N/A           | 1.23E-08 |
| Disease gene   | None        | 2610                                | 2.3         | 0.833    | A: 1.02E-10<br>R: 6.27E-09 | 1.41E-12 | 3136     | 4.6     | 0.052    | A: 2.33E-11<br>R: 2.98E-10 | 1.41E-12 |
|                | Either      | 640                                 | 2.7         |          | A: 1.76E-10<br>R: 3.11E-10 | 5.50E-12 | 763      | 4.5     |          | A: 2.69E-11<br>R: 2.69E-11 | 5.50E-12 |
|                | Both        | 38                                  | 2.6         |          | A: 5.29E-09<br>R: 3.02E-07 | 8.57E-11 | 51       | 11.8    |          | A: 7.11E-10<br>R: 7.22E-09 | 8.57E-11 |
| Any gene       | None        | 1010                                | 2.1         | 0.682    | A: 1.12E-10<br>R: 6.27E-09 | 3.74E-12 | 1252     | 4.4     | 0.297    | A: 2.33E-11<br>R: 6.40E-10 | 3.74E-12 |
|                | Either      | 1633                                | 2.6         |          | A: 1.76E-10<br>R: 3.20E-09 | 2.24E-12 | 1909     | 4.4     |          | A: 2.69E-11<br>R: 2.69E-11 | 2.24E-12 |
|                | Both        | 645                                 | 2.2         |          | A: 1.02E-10<br>R: 3.11E-10 | 5.35E-12 | 789      | 5.7     |          | A: 2.78E-10<br>R: 4.80E-10 | 5.35E-12 |
| Marginal       | None        | 2857                                | 2.2         | 0.439    | A: 1.02E-10<br>R: 3.11E-10 | 1.26E-12 | 3486     | 4.5     | 0.275    | A: 2.33E-11<br>R: 2.69E-11 | 1.26E-12 |
|                | Either      | 415                                 | 3.1         |          | A: 3.26E-10<br>R: 1.30E-08 | 9.54E-12 | 445      | 5.6     |          | A: 5.47E-11<br>R: 6.40E-10 | 9.54E-12 |
|                | Both        | 16                                  | 0           |          | A: 1.45E-08<br>R: N/A      | 2.89E-10 | 19       | 10.5    |          | A: 1.55E-09<br>R: 6.31E-08 | 2.89E-10 |

Followed-up interactions (interactions with  $P < 10^{-7}$  in either the FastEpistasis or BOOST analyses) were grouped by the number of SNPs that match a particular annotation category (**Match group**: none, either, or both SNPs matching). Annotation categories are described in the Supplemental Methods section. **N, total**: total number of interactions in each annotation match group. **N, rep (%)**: percentage of the total that were nominally replicated. **Enrich P**: enrichment test P-value (testing if there is a significant difference between percentages of nominally replicated interactions among the different annotation match groups; chi-square test or Fisher's exact test). **Min Int P**: among all interactions in the particular annotation match category, the P-value of the most significant interaction (A), and the P-value of the most significant nominally replicated interaction (R). **Thresh**: hypothetical significance threshold assuming that the search space was first trimmed to only include SNP pairs corresponding to the particular annotation match group. Green shading: enrichment P-value  $< 0.05$ . Cyan shading: a "Min Int P" value that is less than the respective "Thresh".
