# Supplementary material for: Exhaustive Genome-Wide Search for SNP-SNP Interactions Across 10 Human Diseases
Source: PubMed Central journal article supplement (PMC4938657; doi:10.1534/g3.116.028563), 2016-05-12
Supplement: supp_g3.116.028563_TableS27.pdf [file supp_g3.116.028563_TableS27.pdf]

**Table S-27. Enrichment analysis (dyslipidaemia).**

| Annotation     | Match group | FastEpistasis / logistic regression |             |          |                            |          | BOOST    |         |          |                            |          |
|----------------|-------------|-------------------------------------|-------------|----------|----------------------------|----------|----------|---------|----------|----------------------------|----------|
|                |             | N, total                            | N, rep. (%) | Enrich P | Min Int P                  | Thresh   | N, total | N, rep. | Enrich P | Min Int P                  | Thresh   |
| Exonic         | None        | 3435                                | 2.7         | 0.340    | A: 1.09E-11<br>R: 1.69E-09 | 1.12E-12 | 3776     | 4.2     | 1.000    | A: 2.80E-11<br>R: 2.84E-10 | 1.12E-12 |
|                | Either      | 45                                  | 4.4         |          | A: 1.06E-09<br>R: 1.40E-08 | 6.33E-11 | 39       | 2.6     |          | A: 4.57E-09<br>R: 1.65E-08 | 6.33E-11 |
|                | Both        | 0                                   | 0           |          | A: N/A<br>R: N/A           | 1.44E-08 | 1        | 0       |          | A: 1.07E-08<br>R: N/A      | 1.44E-08 |
| Reg. 1,2, or 3 | None        | 3222                                | 2.6         | 0.208    | A: 1.09E-11<br>R: 6.18E-09 | 1.19E-12 | 3542     | 4.4     | 0.304    | A: 2.80E-11<br>R: 2.84E-10 | 1.19E-12 |
|                | Either      | 252                                 | 4.4         |          | A: 9.85E-11<br>R: 1.69E-09 | 1.41E-11 | 271      | 2.6     |          | A: 1.62E-09<br>R: 1.72E-08 | 1.41E-11 |
|                | Both        | 6                                   | 0           |          | A: 3.13E-09<br>R: N/A      | 6.67E-10 | 3        | 0       |          | A: 1.79E-08<br>R: N/A      | 6.67E-10 |
| Disease EQTL   | None        | 3477                                | 2.7         | 0.078    | A: 1.09E-11<br>R: 1.69E-09 | 1.10E-12 | 3811     | 4.2     | 1.000    | A: 2.80E-11<br>R: 2.84E-10 | 1.10E-12 |
|                | Either      | 3                                   | 33.3        |          | A: 8.93E-09<br>R: 8.93E-09 | 8.33E-10 | 5        | 0       |          | A: 2.65E-08<br>R: N/A      | 8.33E-10 |
|                | Both        | 0                                   | 0           |          | A: N/A<br>R: N/A           | 2.54E-06 | 0        | 0       |          | A: N/A<br>R: N/A           | 2.54E-06 |
| Disease gene   | None        | 3440                                | 2.7         | 0.290    | A: 1.09E-11<br>R: 1.69E-09 | 1.11E-12 | 3768     | 4.2     | 1.000    | A: 2.80E-11<br>R: 2.84E-10 | 1.11E-12 |
|                | Either      | 40                                  | 5.0         |          | A: 4.33E-09<br>R: 8.93E-09 | 9.39E-11 | 48       | 4.2     |          | A: 5.94E-09<br>R: 3.02E-08 | 9.39E-11 |
|                | Both        | 0                                   | 0           |          | A: N/A<br>R: N/A           | 3.18E-08 | 0        | 0       |          | A: N/A<br>R: N/A           | 3.18E-08 |
| Any gene       | None        | 1085                                | 3.6         | 0.055    | A: 1.90E-11<br>R: 8.48E-09 | 3.70E-12 | 1111     | 4.5     | 0.854    | A: 2.80E-11<br>R: 8.70E-10 | 3.70E-12 |
|                | Either      | 1738                                | 2.4         |          | A: 9.85E-11<br>R: 1.69E-09 | 2.21E-12 | 1914     | 4.1     |          | A: 5.43E-11<br>R: 2.84E-10 | 2.21E-12 |
|                | Both        | 657                                 | 1.8         |          | A: 1.09E-11<br>R: 6.18E-09 | 5.30E-12 | 791      | 4.1     |          | A: 9.98E-11<br>R: 9.13E-09 | 5.30E-12 |
| Marginal       | None        | 3124                                | 2.4         | 0.022    | A: 1.90E-11<br>R: 1.69E-09 | 1.25E-12 | 3394     | 4.1     | 0.309    | A: 2.80E-11<br>R: 2.84E-10 | 1.25E-12 |
|                | Either      | 346                                 | 4.9         |          | A: 1.09E-11<br>R: 6.17E-08 | 9.47E-12 | 405      | 5.4     |          | A: 7.95E-11<br>R: 1.88E-09 | 9.47E-12 |
|                | Both        | 10                                  | 0           |          | A: 1.01E-08<br>R: N/A      | 2.88E-10 | 17       | 0       |          | A: 1.94E-08<br>R: N/A      | 2.88E-10 |

Followed-up interactions (interactions with  $P < 10^{-7}$  in either the FastEpistasis or BOOST analyses) were grouped by the number of SNPs that match a particular annotation category (**Match group**: none, either, or both SNPs matching). Annotation categories are described in the Supplemental Methods section. **N, total**: total number of interactions in each annotation match group. **N, rep (%)**: percentage of the total that were nominally replicated. **Enrich P**: enrichment test P-value (testing if there is a significant difference between percentages of nominally replicated interactions among the different annotation match groups; chi-square test or Fisher's exact test). **Min Int P**: among all interactions in the particular annotation match category, the P-value of the most significant interaction (A), and the P-value of the most significant nominally replicated interaction (R). **Thresh**: hypothetical significance threshold assuming that the search space was first trimmed to only include SNP pairs corresponding to the particular annotation match group. Green shading: enrichment P-value  $< 0.05$ . Cyan shading: a "Min Int P" value that is less than the respective "Thresh".
