# Supplementary material for: Exhaustive Genome-Wide Search for SNP-SNP Interactions Across 10 Human Diseases
Source: PubMed Central journal article supplement (PMC4938657; doi:10.1534/g3.116.028563), 2016-05-12
Supplement: supp_g3.116.028563_TableS28.pdf [file supp_g3.116.028563_TableS28.pdf]

**Table S-28. Enrichment analysis (hemorrhoids).**

| Annotation     | Match group | FastEpistasis / logistic regression |             |          |                            |          | BOOST    |         |          |                            |          |
|----------------|-------------|-------------------------------------|-------------|----------|----------------------------|----------|----------|---------|----------|----------------------------|----------|
|                |             | N, total                            | N, rep. (%) | Enrich P | Min Int P                  | Thresh   | N, total | N, rep. | Enrich P | Min Int P                  | Thresh   |
| Exonic         | None        | 3348                                | 2.8         | 1.000    | A: 1.05E-11<br>R: 1.80E-09 | 1.13E-12 | 4013     | 5.2     | 0.358    | A: 1.18E-11<br>R: 1.18E-11 | 1.13E-12 |
|                | Either      | 44                                  | 2.3         |          | A: 2.08E-09<br>R: 7.00E-08 | 6.39E-11 | 53       | 7.6     |          | A: 1.39E-09<br>R: 1.39E-09 | 6.39E-11 |
|                | Both        | 0                                   | 0           |          | A: N/A<br>R: N/A           | 1.45E-08 | 0        | 0       |          | A: N/A<br>R: N/A           | 1.45E-08 |
| Reg. 1,2, or 3 | None        | 3151                                | 2.8         | 0.903    | A: 1.05E-11<br>R: 2.71E-09 | 1.20E-12 | 3759     | 5.0     | 0.013    | A: 1.18E-11<br>R: 1.18E-11 | 1.20E-12 |
|                | Either      | 235                                 | 2.6         |          | A: 6.11E-10<br>R: 1.80E-09 | 1.42E-11 | 299      | 8.7     |          | A: 1.05E-10<br>R: 1.17E-09 | 1.42E-11 |
|                | Both        | 6                                   | 0           |          | A: 1.61E-08<br>R: N/A      | 6.74E-10 | 8        | 12.5    |          | A: 6.03E-09<br>R: 3.04E-08 | 6.74E-10 |
| Disease EQTL   | None        | 3392                                | 2.7         | N/A      | A: 1.05E-11<br>R: 1.80E-09 | 1.11E-12 | 4066     | 5.2     | N/A      | A: 1.18E-11<br>R: 1.18E-11 | 1.11E-12 |
|                | Either      | 0                                   | 0           |          | A: N/A<br>R: N/A           | 2.77E-08 | 0        | 0       |          | A: N/A<br>R: N/A           | 2.77E-08 |
|                | Both        | 0                                   | 0           |          | A: N/A<br>R: N/A           | 3.33E-03 | 0        | 0       |          | A: N/A<br>R: N/A           | 3.33E-03 |
| Disease gene   | None        | 3390                                | 2.7         | 1.000    | A: 1.05E-11<br>R: 1.80E-09 | 1.11E-12 | 4065     | 5.2     | 1.000    | A: 1.18E-11<br>R: 1.18E-11 | 1.11E-12 |
|                | Either      | 2                                   | 0           |          | A: 3.70E-08<br>R: N/A      | 2.11E-09 | 1        | 0       |          | A: 5.44E-08<br>R: N/A      | 2.11E-09 |
|                | Both        | 0                                   | 0           |          | A: N/A<br>R: N/A           | 1.62E-05 | 0        | 0       |          | A: N/A<br>R: N/A           | 1.62E-05 |
| Any gene       | None        | 1074                                | 2.0         | 0.126    | A: 1.05E-11<br>R: 1.05E-08 | 3.73E-12 | 1201     | 4.6     | 0.459    | A: 1.18E-11<br>R: 1.18E-11 | 3.73E-12 |
|                | Either      | 1658                                | 3.3         |          | A: 2.18E-11<br>R: 2.71E-09 | 2.23E-12 | 2074     | 5.5     |          | A: 3.49E-11<br>R: 2.83E-10 | 2.23E-12 |
|                | Both        | 660                                 | 2.7         |          | A: 5.85E-11<br>R: 1.80E-09 | 5.35E-12 | 791      | 5.7     |          | A: 1.36E-10<br>R: 2.94E-09 | 5.35E-12 |
| Marginal       | None        | 3062                                | 2.8         | 0.439    | A: 1.05E-11<br>R: 1.80E-09 | 1.23E-12 | 3649     | 5.1     | 0.216    | A: 1.18E-11<br>R: 1.18E-11 | 1.23E-12 |
|                | Either      | 326                                 | 1.8         |          | A: 6.09E-10<br>R: 5.67E-09 | 1.13E-11 | 406      | 6.9     |          | A: 5.04E-10<br>R: 2.94E-09 | 1.13E-11 |
|                | Both        | 4                                   | 0           |          | A: 6.26E-08<br>R: N/A      | 4.13E-10 | 11       | 0       |          | A: 8.79E-09<br>R: N/A      | 4.13E-10 |

Followed-up interactions (interactions with  $P < 10^{-7}$  in either the FastEpistasis or BOOST analyses) were grouped by the number of SNPs that match a particular annotation category (**Match group**: none, either, or both SNPs matching). Annotation categories are described in the Supplemental Methods section. **N, total**: total number of interactions in each annotation match group. **N, rep (%)**: percentage of the total that were nominally replicated. **Enrich P**: enrichment test P-value (testing if there is a significant difference between percentages of nominally replicated interactions among the different annotation match groups; chi-square test or Fisher’s exact test). **Min Int P**: among all interactions in the particular annotation match category, the P-value of the most significant interaction (A), and the P-value of the most significant nominally replicated interaction (R). **Thresh**: hypothetical significance threshold assuming that the search space was first trimmed to only include SNP pairs corresponding to the particular annotation match group. Green shading: enrichment P-value  $< 0.05$ . Cyan shading: a “Min Int P” value that is less than the respective “Thresh”.
