# Supplementary material for: Exhaustive Genome-Wide Search for SNP-SNP Interactions Across 10 Human Diseases
Source: PubMed Central journal article supplement (PMC4938657; doi:10.1534/g3.116.028563), 2016-05-12
Supplement: supp_g3.116.028563_TableS29.pdf [file supp_g3.116.028563_TableS29.pdf]

**Table S-29. Enrichment analysis (hypertensive disease).**

| Annotation     | Match group | FastEpistasis / logistic regression |             |          |                            |          | BOOST    |         |          |                            |          |
|----------------|-------------|-------------------------------------|-------------|----------|----------------------------|----------|----------|---------|----------|----------------------------|----------|
|                |             | N, total                            | N, rep. (%) | Enrich P | Min Int P                  | Thresh   | N, total | N, rep. | Enrich P | Min Int P                  | Thresh   |
| Exonic         | None        | 3461                                | 2.4         | 0.380    | A: 1.41E-11<br>R: 2.20E-09 | 1.12E-12 | 3898     | 5.9     | 0.391    | A: 1.09E-11<br>R: 2.51E-10 | 1.12E-12 |
|                | Either      | 55                                  | 3.6         |          | A: 6.48E-10<br>R: 1.06E-06 | 6.33E-11 | 58       | 8.6     |          | A: 1.22E-09<br>R: 1.22E-09 | 6.33E-11 |
|                | Both        | 0                                   | 0           |          | A: N/A<br>R: N/A           | 1.43E-08 | 0        | 0       |          | A: N/A<br>R: N/A           | 1.43E-08 |
| Reg. 1,2, or 3 | None        | 3254                                | 2.3         | 0.281    | A: 1.41E-11<br>R: 2.20E-09 | 1.19E-12 | 3638     | 5.9     | 0.652    | A: 1.09E-11<br>R: 1.22E-09 | 1.19E-12 |
|                | Either      | 258                                 | 3.5         |          | A: 2.78E-10<br>R: 7.87E-09 | 1.41E-11 | 311      | 6.8     |          | A: 7.91E-11<br>R: 2.51E-10 | 1.41E-11 |
|                | Both        | 4                                   | 0           |          | A: 8.61E-08<br>R: N/A      | 6.69E-10 | 7        | 0       |          | A: 1.26E-08<br>R: N/A      | 6.69E-10 |
| Disease EQTL   | None        | 3489                                | 2.4         | 0.135    | A: 1.41E-11<br>R: 2.20E-09 | 1.11E-12 | 3929     | 6.0     | 0.404    | A: 1.09E-11<br>R: 2.51E-10 | 1.11E-12 |
|                | Either      | 27                                  | 7.4         |          | A: 2.27E-09<br>R: 1.06E-06 | 9.50E-11 | 27       | 0       |          | A: 5.15E-09<br>R: N/A      | 9.50E-11 |
|                | Both        | 0                                   | 0           |          | A: N/A<br>R: N/A           | 3.24E-08 | 0        | 0       |          | A: N/A<br>R: N/A           | 3.24E-08 |
| Disease gene   | None        | 3171                                | 2.3         | 0.333    | A: 1.41E-11<br>R: 2.20E-09 | 1.22E-12 | 3587     | 5.8     | 0.400    | A: 1.09E-11<br>R: 2.51E-10 | 1.22E-12 |
|                | Either      | 341                                 | 3.2         |          | A: 2.69E-10<br>R: 4.23E-09 | 1.16E-11 | 361      | 7.2     |          | A: 6.99E-11<br>R: 1.17E-08 | 1.16E-11 |
|                | Both        | 4                                   | 0           |          | A: 5.26E-07<br>R: N/A      | 4.41E-10 | 8        | 12.5    |          | A: 1.01E-08<br>R: 1.15E-08 | 4.41E-10 |
| Any gene       | None        | 1073                                | 2.2         | 0.261    | A: 1.41E-11<br>R: 2.20E-09 | 3.70E-12 | 1167     | 5.7     | 0.952    | A: 1.41E-10<br>R: 5.71E-09 | 3.70E-12 |
|                | Either      | 1766                                | 2.2         |          | A: 2.64E-11<br>R: 4.18E-09 | 2.22E-12 | 1995     | 6.0     |          | A: 6.99E-11<br>R: 2.51E-10 | 2.22E-12 |
|                | Both        | 677                                 | 3.3         |          | A: 9.16E-11<br>R: 7.87E-09 | 5.31E-12 | 794      | 5.9     |          | A: 1.09E-11<br>R: 1.96E-09 | 5.31E-12 |
| Marginal       | None        | 3038                                | 2.1         | 1.36E-04 | A: 1.41E-11<br>R: 2.20E-09 | 1.26E-12 | 3467     | 5.9     | 0.552    | A: 1.09E-11<br>R: 2.51E-10 | 1.26E-12 |
|                | Either      | 459                                 | 3.5         |          | A: 1.56E-10<br>R: 2.47E-08 | 8.75E-12 | 472      | 5.5     |          | A: 2.26E-10<br>R: 7.70E-09 | 8.75E-12 |
|                | Both        | 19                                  | 15.8        |          | A: 4.09E-09<br>R: 8.31E-07 | 2.42E-10 | 17       | 11.8    |          | A: 1.18E-08<br>R: 1.86E-08 | 2.42E-10 |

Followed-up interactions (interactions with  $P < 10^{-7}$  in either the FastEpistasis or BOOST analyses) were grouped by the number of SNPs that match a particular annotation category (**Match group**: none, either, or both SNPs matching). Annotation categories are described in the Supplemental Methods section. **N, total**: total number of interactions in each annotation match group. **N, rep (%)**: percentage of the total that were nominally replicated. **Enrich P**: enrichment test P-value (testing if there is a significant difference between percentages of nominally replicated interactions among the different annotation match groups; chi-square test or Fisher's exact test). **Min Int P**: among all interactions in the particular annotation match category, the P-value of the most significant interaction (A), and the P-value of the most significant nominally replicated interaction (R). **Thresh**: hypothetical significance threshold assuming that the search space was first trimmed to only include SNP pairs corresponding to the particular annotation match group. Green shading: enrichment P-value  $< 0.05$ . Cyan shading: a "Min Int P" value that is less than the respective "Thresh".
