# Supplementary material for: Exhaustive Genome-Wide Search for SNP-SNP Interactions Across 10 Human Diseases
Source: PubMed Central journal article supplement (PMC4938657; doi:10.1534/g3.116.028563), 2016-05-12
Supplement: supp_g3.116.028563_TableS30.pdf [file supp_g3.116.028563_TableS30.pdf]

**Table S-30. Enrichment analysis (osteoarthritis).**

| Annotation     | Match group | FastEpistasis / logistic regression |             |          |                            |          | BOOST    |         |          |                            |          |
|----------------|-------------|-------------------------------------|-------------|----------|----------------------------|----------|----------|---------|----------|----------------------------|----------|
|                |             | N, total                            | N, rep. (%) | Enrich P | Min Int P                  | Thresh   | N, total | N, rep. | Enrich P | Min Int P                  | Thresh   |
| Exonic         | None        | 3313                                | 3.0         | 0.181    | A: 1.86E-11<br>R: 1.33E-10 | 1.12E-12 | 3650     | 5.8     | 0.075    | A: 1.85E-11<br>R: 2.78E-10 | 1.12E-12 |
|                | Either      | 48                                  | 6.3         |          | A: 1.57E-09<br>R: 2.07E-07 | 6.35E-11 | 56       | 0       |          | A: 1.54E-10<br>R: N/A      | 6.35E-11 |
|                | Both        | 0                                   | 0           |          | A: N/A<br>R: N/A           | 1.44E-08 | 0        | 0       |          | A: N/A<br>R: N/A           | 1.44E-08 |
| Reg. 1,2, or 3 | None        | 3118                                | 3.1         | 1.000    | A: 1.86E-11<br>R: 1.33E-10 | 1.20E-12 | 3425     | 5.8     | 0.541    | A: 1.85E-11<br>R: 2.78E-10 | 1.20E-12 |
|                | Either      | 238                                 | 2.9         |          | A: 4.22E-10<br>R: 3.88E-08 | 1.42E-11 | 271      | 4.4     |          | A: 9.50E-10<br>R: 2.99E-08 | 1.42E-11 |
|                | Both        | 5                                   | 0           |          | A: 5.82E-08<br>R: N/A      | 6.70E-10 | 10       | 10.0    |          | A: 5.46E-09<br>R: 5.46E-09 | 6.70E-10 |
| Disease EQTL   | None        | 3354                                | 3.1         | 1.000    | A: 1.86E-11<br>R: 1.33E-10 | 1.11E-12 | 3697     | 5.7     | 0.412    | A: 1.85E-11<br>R: 2.78E-10 | 1.11E-12 |
|                | Either      | 7                                   | 0           |          | A: 3.57E-09<br>R: N/A      | 2.09E-10 | 9        | 11.1    |          | A: 1.10E-08<br>R: 5.54E-08 | 2.09E-10 |
|                | Both        | 0                                   | 0           |          | A: N/A<br>R: N/A           | 1.58E-07 | 0        | 0       |          | A: N/A<br>R: N/A           | 1.58E-07 |
| Disease gene   | None        | 3315                                | 3.1         | 0.651    | A: 1.86E-11<br>R: 1.33E-10 | 1.12E-12 | 3652     | 5.7     | 0.235    | A: 1.85E-11<br>R: 2.78E-10 | 1.12E-12 |
|                | Either      | 46                                  | 4.4         |          | A: 2.26E-09<br>R: 2.40E-07 | 7.70E-11 | 54       | 9.3     |          | A: 2.45E-09<br>R: 2.66E-08 | 7.70E-11 |
|                | Both        | 0                                   | 0           |          | A: N/A<br>R: N/A           | 2.12E-08 | 0        | 0       |          | A: N/A<br>R: N/A           | 2.12E-08 |
| Any gene       | None        | 1083                                | 3.1         | 0.537    | A: 8.15E-11<br>R: 1.33E-10 | 3.71E-12 | 1181     | 6.3     | 0.560    | A: 6.12E-11<br>R: 2.78E-10 | 3.71E-12 |
|                | Either      | 1657                                | 3.3         |          | A: 2.57E-10<br>R: 4.40E-10 | 2.22E-12 | 1800     | 5.3     |          | A: 1.85E-11<br>R: 8.63E-10 | 2.22E-12 |
|                | Both        | 621                                 | 2.4         |          | A: 1.86E-11<br>R: 2.43E-09 | 5.32E-12 | 725      | 5.8     |          | A: 1.38E-10<br>R: 1.16E-09 | 5.32E-12 |
| Marginal       | None        | 3006                                | 3.0         | 0.625    | A: 1.86E-11<br>R: 1.33E-10 | 1.23E-12 | 3328     | 5.8     | 0.731    | A: 1.85E-11<br>R: 2.78E-10 | 1.23E-12 |
|                | Either      | 345                                 | 3.8         |          | A: 2.24E-10<br>R: 9.83E-09 | 1.07E-11 | 366      | 4.9     |          | A: 1.24E-10<br>R: 1.16E-09 | 1.07E-11 |
|                | Both        | 10                                  | 0           |          | A: 2.34E-08<br>R: N/A      | 3.74E-10 | 12       | 8.3     |          | A: 2.23E-09<br>R: 5.71E-08 | 3.74E-10 |

Followed-up interactions (interactions with  $P < 10^{-7}$  in either the FastEpistasis or BOOST analyses) were grouped by the number of SNPs that match a particular annotation category (**Match group**: none, either, or both SNPs matching). Annotation categories are described in the Supplemental Methods section. **N, total**: total number of interactions in each annotation match group. **N, rep (%)**: percentage of the total that were nominally replicated. **Enrich P**: enrichment test P-value (testing if there is a significant difference between percentages of nominally replicated interactions among the different annotation match groups; chi-square test or Fisher's exact test). **Min Int P**: among all interactions in the particular annotation match category, the P-value of the most significant interaction (A), and the P-value of the most significant nominally replicated interaction (R). **Thresh**: hypothetical significance threshold assuming that the search space was first trimmed to only include SNP pairs corresponding to the particular annotation match group. Green shading: enrichment P-value  $< 0.05$ . Cyan shading: a "Min Int P" value that is less than the respective "Thresh".
