# Supplementary material for: Exhaustive Genome-Wide Search for SNP-SNP Interactions Across 10 Human Diseases
Source: PubMed Central journal article supplement (PMC4938657; doi:10.1534/g3.116.028563), 2016-05-12
Supplement: supp_g3.116.028563_TableS31.pdf [file supp_g3.116.028563_TableS31.pdf]

**Table S-31A. BioGRID interactions (FastEpistasis with logistic regression), by condition.**

| Condition         | SNP1      |     |    |    | SNP2       |     |    |    | Discovery |          |                   |          | Replication |                   |          | Rep.? | Gene1 | Gene2 |
|-------------------|-----------|-----|----|----|------------|-----|----|----|-----------|----------|-------------------|----------|-------------|-------------------|----------|-------|-------|-------|
|                   | RSID      | Chr | A1 | A0 | RSID       | Chr | A1 | A0 | FE, P     | Unadj, P | Adj, OR           | Adj, P   | Unadj, P    | Adj, OR           | Adj, p   |       |       |       |
| Allergic rhinitis | None      |     |    |    |            |     |    |    |           |          |                   |          |             |                   |          |       |       |       |
| Asthma            | rs300572  | 4   | A  | G  | rs2414444  | 15  | C  | T  | 4.78E-08  | 8.67E-08 | 0.86 (0.81, 0.91) | 6.90E-08 | 7.82E-01    | 0.99 (0.85, 1.15) | 8.75E-01 | No    | SPRY1 | NEDD4 |
| Cardiac disease   | None      |     |    |    |            |     |    |    |           |          |                   |          |             |                   |          |       |       |       |
| Depression        | rs3177954 | 14  | C  | T  | rs179255   | 14  | A  | G  | 6.72E-08  | 8.22E-08 | 0.83 (0.77, 0.89) | 9.30E-08 | 4.07E-01    | 1.08 (0.91, 1.28) | 3.61E-01 | No    | SALL2 | TSHR  |
| Dermatophytosis   | None      |     |    |    |            |     |    |    |           |          |                   |          |             |                   |          |       |       |       |
| Diabetes, type 2  | None      |     |    |    |            |     |    |    |           |          |                   |          |             |                   |          |       |       |       |
| Dyslipidaemia     | None      |     |    |    |            |     |    |    |           |          |                   |          |             |                   |          |       |       |       |
| Hemorrhoids       | rs996174  | 3   | C  | T  | rs17064660 | 3   | A  | G  | 9.98E-08  | 1.20E-07 | 0.83 (0.77, 0.89) | 1.27E-07 | 6.72E-01    | 0.96 (0.80, 1.15) | 6.30E-01 | No    | FHIT  | FHIT  |
| Hypertensive dis. | None      |     |    |    |            |     |    |    |           |          |                   |          |             |                   |          |       |       |       |
| Osteoarthritis    | None      |     |    |    |            |     |    |    |           |          |                   |          |             |                   |          |       |       |       |

Interactions were first analyzed with FastEpistasis. Each interaction with FastEpistasis  $P < 10^{-7}$  was assessed to determine if it met the criteria of being a “BioGRID interaction” (see the Supplemental Methods section). All such interactions are listed here and were subjected to analysis with logistic regression. **Chr**: chromosome number. **A1**: non-referent allele. **A0**: referent allele. **FE, P**: P-value from the Fast Epistasis analysis. **Unadj, P**: P-value from the unadjusted logistic regression analysis. **Adj, OR**: interaction odds ratio and 95% confidence interval, from the adjusted logistic regression analysis. **Adj, P**: P-value from the adjusted logistic regression analysis. All “adjusted” analyses were adjusted for the first two principal components, birth year category, and sex. **Rep.?** Whether or not the interaction was nominally replicated. **Gene1, Gene2**: gene assigned to SNP1 and SNP2, respectively. **None**: for these conditions, there were no interactions with FastEpistasis  $P < 10^{-7}$  that could be considered a BioGRID interaction.

**Table S-31B. BioGRID interactions (BOOST), by condition.**

| Condition         | SNP1      |     |    |    | SNP2      |     |    |    | Discovery P | Replication P | Rep.? | Gene1 | Gene2 |
|-------------------|-----------|-----|----|----|-----------|-----|----|----|-------------|---------------|-------|-------|-------|
|                   | RSID      | Chr | A1 | A0 | RSID      | Chr | A1 | A0 |             |               |       |       |       |
| Allergic rhinitis | None      |     |    |    |           |     |    |    |             |               |       |       |       |
| Asthma            | rs300572  | 4   | A  | G  | rs2414444 | 15  | C  | T  | 1.25E-08    | 6.35E-01      | No    | SPRY1 | NEDD4 |
| Cardiac disease   | None      |     |    |    |           |     |    |    |             |               |       |       |       |
| Depression        | None      |     |    |    |           |     |    |    |             |               |       |       |       |
| Dermatophytosis   | None      |     |    |    |           |     |    |    |             |               |       |       |       |
| Diabetes, type 2  | rs7933204 | 11  | G  | A  | rs2388067 | 13  | T  | G  | 6.72E-08    | 5.77E-01      | No    | ROBO3 | MTUS2 |
| Dyslipidaemia     | None      |     |    |    |           |     |    |    |             |               |       |       |       |
| Hemorrhoids       | None      |     |    |    |           |     |    |    |             |               |       |       |       |
| Hypertensive dis. | None      |     |    |    |           |     |    |    |             |               |       |       |       |
| Osteoarthritis    | None      |     |    |    |           |     |    |    |             |               |       |       |       |

Interactions were first analyzed with BOOST. Each interaction with BOOST  $P < 10^{-7}$  was assessed to determine if it met the criteria of being a “BioGRID interaction” (see the Supplemental Methods section). All such interactions are listed here. **Chr**: chromosome number. **A1**: non-referent allele. **A0**: referent allele. **Discovery P**: P-value from the discovery BOOST analysis. **Replication P**: P-value from the replication BOOST analysis. **Rep.?** Whether or not the interaction was nominally replicated. **Gene1, Gene2**: gene assigned to SNP1 and SNP2, respectively. **None**: for these conditions, there were no interactions with BOOST  $P < 10^{-7}$  that could be considered a BioGRID interaction.
